# TYPICAL AND ATYPICAL LANGUAGE BRAIN ORGANIZATION BASED ON INTRINSIC CONNECTIVITY AND MULTITASK FUNCTIONAL ASYMMETRIES

Loïc Labache<sup>1, 2, 3, 4, 5, 6</sup>, Bernard Mazoyer<sup>1, 2, 3, 7</sup>, Marc Joliot<sup>1, 2, 3</sup>, Fabrice Crivello<sup>1, 2, 3</sup>,  
Isabelle Hesling<sup>1, 2, 3</sup>, Nathalie Tzourio-Mazoyer<sup>1, 2, 3</sup>

Submitted on 3 May 2020

**ABSTRACT** We applied a multitask multimodal hierarchical classification (MMHC) to 287 volunteers (150 left-handers) to establish different brain language hemispheric dominance patterns (LangDom). MMHC was based on inter- and intrahemispheric measures of the sentence core network (SENT\_CORE): 1) task-induced asymmetries (ACTIV) while listening to, reading, and producing sentences compared to word lists; 2) resting-state degree connectivity (Rs\_DC) and asymmetry; and 3) interhemispheric connectivity (Rs\_mIHHC). Three LangDom were found, including two typical groups, one with higher (N=125) leftward ACTIV and Rs\_DC asymmetries and lower Rs\_mIHHC than the other (N=132). The third was an atypical group (ATYP, N=30, 25 left-handers), having rightward ACTIV during the 3 language tasks but high Rs\_DC in both hemispheres and high Rs\_mIHHC. ATYP LangDom relies on a left SENT\_CORE wired for language by default with strong interhemispheric connections with their right SENT\_CORE. This loose specialization was associated with 40% of dissociations, decreased anatomical asymmetries, and lower verbal memory.

**Keywords** language organization · language · corpus callosum · asymmetries · intrinsic connectivity · hemispheric specialization · handedness

## INTRODUCTION

Hemispheric specialization, and more particularly hemispheric specialization for language (HSL), can be defined as “... a hemisphere-dependent relationship between a cognitive, sensory, or motor function and a

set of brain structures. It includes both the hosting by a given hemisphere of specialized networks that have unique functional properties and mechanisms that enable the inter-hemispheric coordination necessary for efficient processing” (Hervé, Zago, Petit, Mazoyer, & Tzourio-Mazoyer, 2013). Major issues on the topic of hemispheric functional segregation have been listed in a recent review article (Vingerhoets, 2019). Highlighting the importance of in-depth investigations of individuals exhibiting atypical hemispheric lateralization for language production, several burning questions related to this atypical phenotype were identified including the characterization of its regional pattern, its relationship with handedness, its structural underpinnings, whether such atypicality holds for other cognitive functional phenotypes, and is associated with variations in behaviour and/or cognitive abilities.

To comprehensively understand typical and atypical hemispheric organization for high-order language processing, it is necessary to examine the functional organization of the language network in the dominant hemisphere together with its interhemispheric coordination with the mirroring network in the opposite hemisphere. Such an approach can be completed by integrating different and complementary neuroimaging information provided by resting-state and task-induced activation investigations.

Task-induced functional asymmetries are reliable markers for assessing individuals’ HSL, as attested by the very good concordance between fMRI

---

Corresponding author:

Bernard Mazoyer

[bernard.mazoyer@u-bordeaux.fr](mailto:bernard.mazoyer@u-bordeaux.fr)

<sup>1</sup> Université de Bordeaux, Institut des Maladies Neurodégénératives, UMR 5293, Groupe d’Imagerie Neurofonctionnelle, F-33000 Bordeaux, France

<sup>2</sup> CNRS, Institut des Maladies Neurodégénératives, UMR 5293, Groupe d’Imagerie Neurofonctionnelle, F-33000 Bordeaux, France

<sup>3</sup> CEA, Institut des Maladies Neurodégénératives, UMR 5293, Groupe d’Imagerie Neurofonctionnelle, F-33000 Bordeaux, France

<sup>4</sup> Université de Bordeaux, Institut de Mathématiques de Bordeaux, UMR 5251, F-33000 Bordeaux

<sup>5</sup> CNRS, Institut de Mathématiques de Bordeaux, UMR 5251, F-33000 Bordeaux

<sup>6</sup> INRIA Bordeaux Sud-Ouest, Institut de Mathématiques de Bordeaux, UMR 5251, Contrôle de Qualité et Fiabilité Dynamique, F-33405 Talence, France

<sup>7</sup> Centre Hospitalier Universitaire de Bordeaux, F-33076 Bordeaux, France

asymmetries measured during language tasks and Wada testing, which is considered the gold standard to measure dominance (Dym, Burns, Freeman, & Lipton, 2011). This methodology makes it possible to revisit the incidence of atypical organization in healthy individuals in relationship with handedness. The earliest research on this topic reported that rare individuals presenting a shift in lateralization —having rightward asymmetry during language tasks— can be found in left-handers (Hund-Georgiadis, Lex, Friederici, & von Cramon, 2002; Pujol, Deus, Losilla, & Capdevila, 1999; Szafarski et al., 2002). This last observation is consistent with previous aphasia studies (Hécaen & Sauguet, 1971) and investigations of epileptic patients with Wada testing (Isaacs, Barr, Nelson, & Devinsky, 2006), but the very low incidence of atypical individuals coupled with the low incidence of left handedness is a difficulty in the assessment of language lateralization variability in healthy individuals. To overcome this issue, we gathered a database of healthy volunteers specifically enriched in left-handers (BIL&GIN; Mazoyer et al., 2016) and measured the hemispheric functional lateralization index (HFLI; Wilke & Schmithorst, 2006) for sentence production in 297 of its participants. We thereby uncovered 3 patterns of language lateralization, namely, 10 strong-atypical individuals with strong rightward lateralization that included only left-handers, 37 ambilateral individuals with weak or no lateralization and 250 typical individuals with strong leftward lateralization (Mazoyer et al., 2014). In a subsequent investigation of regional asymmetries in these same participants, we provided evidence that there were no differences between typical right- and left-handers in terms of regional patterns of asymmetry. In contrast, left-handed ambilaterals were not lateralized unlike right-handed ambilaterals who showed a modest leftward asymmetry (Tzourio-Mazoyer, Joliot, Marie, & Mazoyer, 2016). Left-handed ambilaterals were also characterized by higher connectivity at rest across homotopic language regions suggesting that enhanced interhemispheric cooperation at rest is a marker of increased interhemispheric cooperation associated with decreased asymmetries (Tzourio-Mazoyer et al., 2016).

This last result highlights the importance of resting-state fMRI for the investigation of language network organization, as it makes it possible to measure the functional intrinsic connectivity of networks within each hemisphere and the differences in connectivity between the hemispheres. Raemaekers, Schellekens, Petridou, and Ramsey (2018) showed a significant association across individuals between the asymmetry in functional connectivity scores and the asymmetries in language task lateralization scores measured in language regions located along the longitudinal fissure in 423 healthy volunteers. Consistent with the Raemaekers et al. report, we have recently shown that in the left hemisphere, the resting state

degree centrality ( $R_s\_DC$ ), or strength of connectivity, was significantly correlated with task-induced activations in the supramodal network of regions dedicated to sentence processing (SENT\_CORE; Labache et al., 2019). Moreover, the Reynolds' study involving 117 children demonstrated that asymmetry in the strength of connectivity between language areas followed the same developmental pattern of increases in asymmetry between 2 and 7 years old (Reynolds, Long, Grohs, Dewey, & Lebel, 2019) as that reported with task-induced activations (Friederici, Brauer, & Lohmann, 2011; Perani et al., 2011). Finally, such asymmetries in within-hemisphere intrinsic connectivity at rest are modified in individuals with rightward lateralization for language production (Joliot, Tzourio-Mazoyer, & Mazoyer, 2016). Taken together, these studies demonstrate that language network intrinsic connectivity and its asymmetry are important markers to characterize the variability in language organization in the brain.

A key issue that remains unresolved regarding the typical and atypical organization for language in healthy individuals is that of dissociation. Actually, there is very little knowledge on homogeneity in lateralization across different language components in healthy individuals. Neuropsychological studies such as the seminal study conducted by Hécaen in left-handers (Hécaen & Sauguet, 1971; Hécaen, De Agostini, & Monzon-Montes, 1981) have shown that hemispheric dominance is not a property of a given hemisphere but rather that the dominant hemisphere may shift for different language functions in some individuals. After left hemisphere lesions, left-handed aphasic patients can show rare deficits in comprehension, while deficits in production are constant, indicating a dissociation of these two language components (Hécaen et al., 1981). PET studies with healthy volunteers have provided evidence of dissociations between production and comprehension in rare left-handers, with a leftward asymmetry during production and a rightward asymmetry during comprehension (for example, Tzourio-Mazoyer, Josse, Crivello, & Mazoyer, 2004). In pathological states, particularly epilepsy, several studies have reported dissociations between asymmetries for language production and those for listening (Baciu et al., 2003; Kurthen et al., 1994; Kurthen et al., 1992; Lee et al., 2008), and the results of a longitudinal study of Wada testing in 4 of these patients suggested that language production was more likely to shift hemispheres than speech comprehension (Lee et al., 2008).

The occurrence of dissociation, particularly in some healthy individuals, suggests a potential independence of different language components in terms of hemispheric dominance, which calls for the search for factors in brain organization that could allow different language components to be hosted in different hemispheres. One hypothesis could be that a loose organization in terms of lateralization, marked by some bilateral involvement of language areas and strong

interhemispheric connectivity, would make it possible for different language components to be lateralized in different hemispheres. In such a case, one should observe an increased occurrence of dissociations in atypicals, and a better knowledge of the characteristics of the individuals who are more likely to host dissociations will make it possible to optimize the neuroimaging paradigm used to determine language lateralization. For example, as implemented in presurgical evaluations of epileptic patients (Baciu et al., 2003, 2005), a paradigm that includes a battery of language tasks in addition to production could be designed for this subpopulation.

Regarding these matters, the present study, which includes measures of lateralization during production, listening and reading tasks in the same participants, is an opportunity to refine the understanding of dissociations. Reading is the last language function acquired through development, since the emergence of this language component relies on strong interactions between speech, eye motor systems, and preorthographic processing by visuospatial attentional areas whose lateralization is located in different hemispheres (Lobier, Peyrin, Le Bas, & Valdois, 2012; Petit et al., 2014). One might suggest that dissociations between the lateralization of speech comprehension and production could occur from two different sources of variability: speech perception (Zatorre, Belin, & Penhune, 2002) and motor control of speech (Lieberman et al., 2007), respectively. Nevertheless, examining reading lateralization, which is established later on the basis of comprehension and production lateralization, will allow us to enlarge the question of the possible sources of interindividual variability in language lateralization to that of the relationships between rightward lateralized visuospatial functions and leftward lateralized language functions.

Hemispheric asymmetries in gray and white matter have been used to investigate variability in HSL, although these measures mainly provide information on inherited gross anatomical differences between the two hemispheres, which are observable at the whole brain level as a global torsion of the brain (i.e., the Yakovlevian torque; Toga & Thompson, 2003). In areas related to language processing, such as the planum temporale close to the sylvian fissure, leftward asymmetries of fissure depth are seen in utero (Habas et al., 2012), and these asymmetries are of the same amplitude at birth as in adults (Hill et al., 2010), showing no subsequent modifications during development (Li et al., 2014). Notably, in adults, the gross leftward asymmetry of the planum temporale does not have the characteristics of a marker of hemispheric dominance at the individual level (Tzourio-Mazoyer, Crivello, & Mazoyer, 2018). Even if some local relationships were found between gray matter and language task-induced functional asymmetries during word listening, they explain only a small fraction of the

interindividual variability of local functional asymmetries (Josse, Kherif, Flandin, Seghier, & Price, 2009). The corpus callosum, made of fibers connecting both hemispheres, has also been investigated as it is the main anatomical support for interhemispheric connectivity. The corpus callosum surface or volume has thus been measured as a potential anatomical marker of this interhemispheric connectivity. Actually, during the course of phylogenesis, increasing brain volumes go along with decreasing corpus callosum volumes relative to brain size (review in Hopkins & Cantalupo, 2008). On this basis, one should expect that a strong lateralization would be associated with a smaller corpus callosum volume, as previously observed in males for anatomical hemispheric asymmetries (Dorion et al., 2000). To date, no studies have investigated the direct relationships between the interindividual variability in HSL and anatomical hemispheric asymmetries or corpus callosum volume, so there is still no evidence of a direct association between anatomical and functional asymmetries.

This survey of previous findings can be summarized in the following way: leftward lateralized typical individuals can be right- or left-handers, they have leftward anatomical asymmetries both at the hemispheric level and at the regional level, they are leftward asymmetrical during language production and leftward asymmetrical for  $R_s\_DC$  at rest, and they show lower intrinsic interhemispheric connectivity than individuals who are symmetrical during language production. In contrast, the type of organization in individuals who are not leftward lateralized is difficult to summarize because of the low incidence of atypical language lateralization and its heterogeneity. For instance, either a rightward asymmetry or an absence of asymmetry during language production can be observed in atypical individuals, corresponding either to a shift in the dominant hemisphere or to bilateral dominant or nondominant hemispheres, as we have previously shown using support vector machine (SVM; Zago et al., 2017). Moreover, to our knowledge, there is a lack of information on the lateralization of language comprehension and reading and the occurrence of dissociations in relation to typical or atypical language organization.

Another open question is the relationship between typical and atypical HSL and cognitive performance that can be envisioned within different frameworks. Some authors have proposed that the decreased verbal performance observed in language developmental disorders may be related to a lack of lateralization (Bishop, 2013; Tallal, 1981; Tallal & Schwartz, 1981). In healthy volunteers, there is some evidence of such a relationship but with a moderate impact on performance not specific to verbal abilities (Mellet et al., 2014). A larger framework would be the possible association between defects in complementary specialization and nonoptimal cognitive functioning (reviewed in Vingerhoets, 2019), with such an abnormal setting of

complementary specialization being expected to occur in individuals with atypical HSL brain organization.

In the present work, we address the question of interindividual variability in language organization in healthy individuals using 287 participants from the BIL&GIN who completed both resting-state fMRI and task-related fMRI during sentence-production, sentence-listening and sentence-reading tasks. These participants also completed a battery of 7 verbal and 4 visuospatial tests (Mazoyer et al., 2016). In each individual, task-induced asymmetries and resting-state connectivity metrics of the SENT\_CORE network (Labache et al., 2019), as well as task-induced asymmetries averaged over the 3 hubs in this network (SENT\_HUBS), were entered in an unsupervised agglomerative hierarchical classification to identify groups with different intra- and interhemispheric organization among sentence-processing areas. We then investigated, within the different clusters, the occurrence of dissociation to evaluate whether such an occurrence was more frequent in nontypical individuals based on the hypothesis that decreased intrahemispheric lateralization and increased interhemispheric cooperation would release the constraint on having all language components controlled by the same hemisphere. We also questioned whether anatomical differences (hemispheric gray and white matter and corpus callosum volumes) were present depending on the type of organization and on the occurrence of dissociation and whether the different functional profiles of sentence network organization were associated with variation in verbal and visuospatial cognitive abilities. Finally, because the identification of atypical individuals with neuroimaging is an ongoing question, we provide a comparison of the present classification to two previous classifications we applied to the same sample of individuals using the sentence minus word-list production task alone; these earlier classifications were based on a multi-Gaussian modeling of the HFLI (Mazoyer et al., 2014) and on SVM operating at the voxel level on the task-induced contrast maps (Zago et al., 2017).

## RESULTS

### Descriptive statistics of the groups identified by hierarchical clustering

The agglomerative hierarchical procedure resulted in the identification of 3 clusters; 3 clusters were found to be optimal by 14 R statistical indices (from over 30 that were used to assess the quality of the classification). Hereafter, we will refer to these clusters as groups varying in their «language organization». These 3 clusters were labeled according to their task-induced mean asymmetries: a first cluster including 125 participants with strong leftward asymmetries in the 3 language tasks was named strong typical (TYP\_STRONG; see Table 1 and Figure 1), a

second cluster of 132 participants exhibiting moderate leftward asymmetry was labeled mild typical (TYP\_MILD), while the third cluster included the remaining 30 participants showing rightward mean asymmetry in the 3 tasks was labeled atypical (ATYP). Whenever needed, the TYP\_STRONG and TYP\_MILD groups were pooled and referred to as the TYP group.

### Task performance

Response time in each of the 3 tasks did not depend on “language organization” (Table 2), when age, handedness and sex were taken into account (all  $p > 0.49$ ). The mean number of words generated per sentence was 12.4 (SD = 2.0), was also independent of “language organization” classification, when age, handedness and sex were taken into account ( $p = 0.97$ ). Note that the average number of recalled sentences was 9.42 (SD = 0.96) for a maximum of 10.

### Demography and handedness

A significant difference was observed in the proportion of left-handers among the 3 “language organization” groups ( $p = 0.0007$ ) due to a larger proportion of left-handers in the ATYP (83.3%) than in either the TYP\_MILD (49.3%) or TYP\_STRONG (46.4%) groups. The differences in the proportion of left-handers was significant between the ATYP and TYP\_MILD groups ( $p = 0.0007$ ) and ATYP and TYP\_STRONG groups ( $p = 0.0001$ ), while no difference was observed between the TYP\_MILD and TYP\_STRONG groups ( $p = 0.48$ ).

The proportion of women differed among the 3 groups ( $p = 0.006$ , chi-square test); the proportion was significantly higher in the TYP\_MILD group (58%) than in the TYP\_STRONG group (38%;  $p = 0.0013$ , t-test) but was not different between the ATYP group (50%) and either the TYP\_MILD ( $p = 0.41$ ) or TYP\_STRONG ( $p = 0.25$ ) groups.

Note that there were no significant differences in age or cultural levels between the 3 groups ( $p > 0.29$  in both cases).

### Profile of task-induced lateralization according to “language organization”

A significant “task” by “language organization” interaction on the absolute values of task-induced asymmetry was found for both the SENT\_CORE and the SENT\_HUBS set of regions of interest (ROIs) (MANOVA analyses,  $p < 10^{-4}$  for both cases; see Figure 1 and Table 1). Indeed, in contrast to the two other groups, the ATYP group did not show any difference in asymmetry across the language tasks in either SENT\_CORE (all  $p > 0.99$ ) or SENT\_HUBS ( $p > 0.83$ ). In contrast, there were significant differences between tasks for either the TYP\_STRONG or TYP\_MILD groups in both SENT\_CORE and SENT\_HUBS, with a stronger asymmetry during the PROD<sub>SENT-WORD</sub> than during the READ<sub>SENT-WORD</sub> task

**Figure 1.** Scatterplots of individual asymmetry values in each task measured as the mean of SENT\_CORE and as the mean of the 3 hubs (SENT\_HUBS) for the 3 groups clustered by hierarchical clustering and stratified according to their status as CONGRUENT or CROSSED and their handedness (right-handers: RH, left-handers: LH). The first row depicts the location of the 18 hROIs constituting the SENT\_CORE network (left) and the 3 hROIs constituting SENT\_HUBS (right). Atypicals (ATYP), typicals with moderate asymmetries (TYP\_MILD) and typicals with strong asymmetries (TYP\_STRONG) correspond to the 3 groups resulting from multitask and multimodal hierarchical agglomerative clustering (PROD<sub>SENT-WORD</sub>: red, LISN<sub>SENT-WORD</sub>: green and READ<sub>SENT-WORD</sub>: blue).

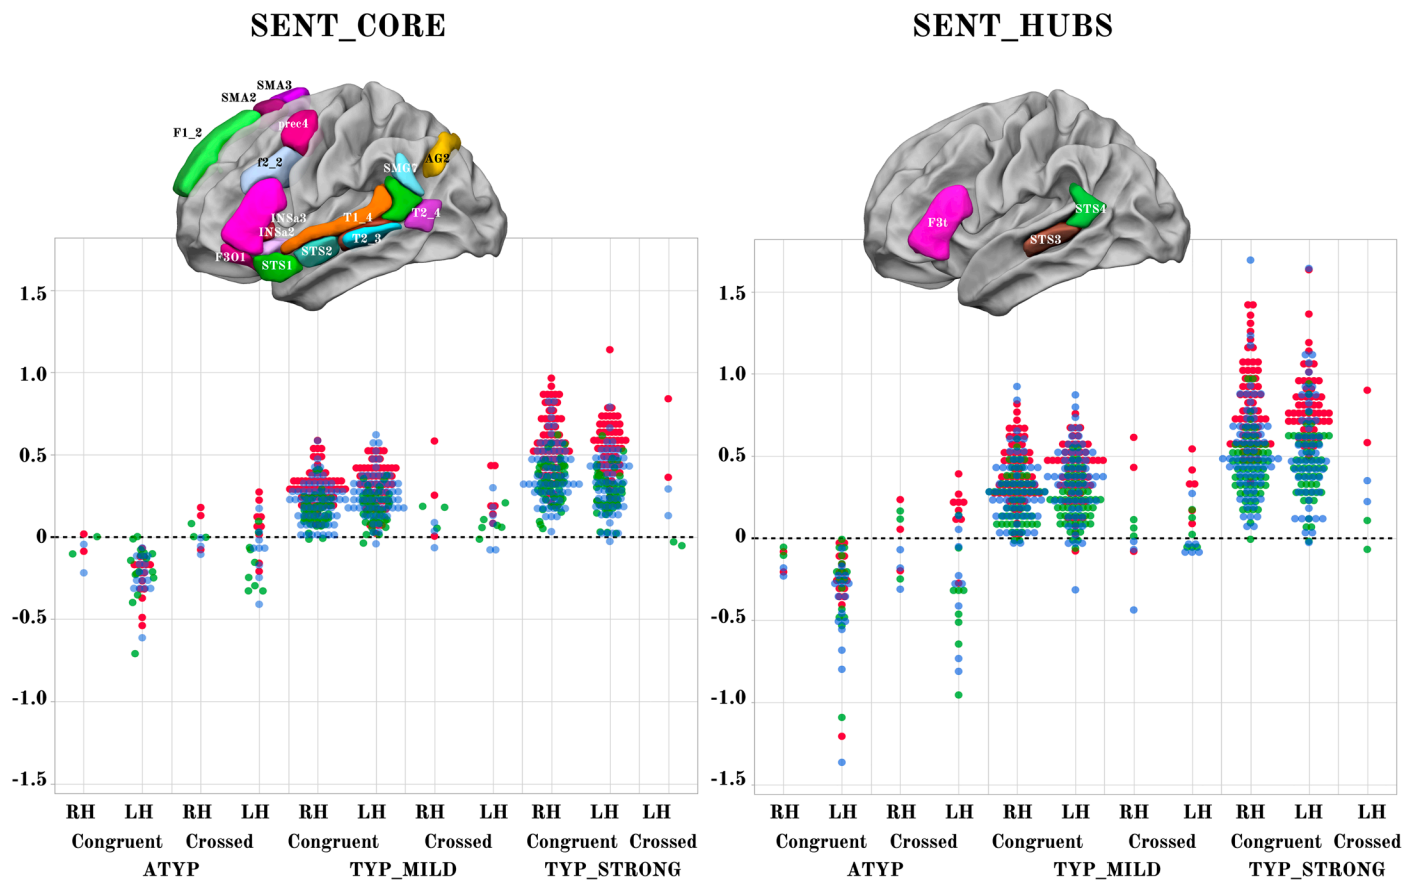

|                                     | TYP_STRONG<br>N = 125 | TYP_MILD<br>N = 132 | ATYP<br>N = 30 |
|-------------------------------------|-----------------------|---------------------|----------------|
| <b>Task-induced variables</b>       |                       |                     |                |
| <b>SENT_CORE asymmetry</b>          |                       |                     |                |
| PROD <sub>SENT-WORD</sub>           | 0.55 (0.17)           | 0.29 (0.12)         | -0.11 (0.19)   |
| LISN <sub>SENT-WORD</sub>           | 0.29 (0.13)           | 0.16 (0.09)         | -0.15 (0.17)   |
| READ <sub>SENT-WORD</sub>           | 0.35 (0.18)           | 0.21 (0.14)         | -0.17 (0.15)   |
| <b>SENT_HUBS asymmetry</b>          |                       |                     |                |
| PROD <sub>SENT-WORD</sub>           | 0.80 (0.23)           | 0.39 (0.18)         | -0.11 (0.30)   |
| LISN <sub>SENT-WORD</sub>           | 0.42 (0.19)           | 0.21 (0.15)         | -0.29 (0.28)   |
| READ <sub>SENT-WORD</sub>           | 0.51 (0.29)           | 0.28 (0.23)         | -0.35 (0.30)   |
| <b>SENT_CORE absolute asymmetry</b> |                       |                     |                |
| PROD <sub>SENT-WORD</sub>           | 0.55 (0.17)           | 0.29 (0.12)         | 0.19 (0.12)    |
| LISN <sub>SENT-WORD</sub>           | 0.30 (0.12)           | 0.16 (0.08)         | 0.16 (0.12)    |
| READ <sub>SENT-WORD</sub>           | 0.35 (0.18)           | 0.22 (0.13)         | 0.18 (0.13)    |
| <b>SENT_HUBS absolute asymmetry</b> |                       |                     |                |
| PROD <sub>SENT-WORD</sub>           | 0.80 (0.23)           | 0.39 (0.17)         | 0.25 (0.20)    |
| LISN <sub>SENT-WORD</sub>           | 0.43 (0.19)           | 0.21 (0.14)         | 0.31 (0.25)    |
| READ <sub>SENT-WORD</sub>           | 0.51 (0.30)           | 0.30 (0.20)         | 0.37 (0.28)    |
| <b>Resting-state variables</b>      |                       |                     |                |
| Rs_mIHHC                            | 0.57 (0.07)           | 0.57 (0.07)         | 0.61 (0.06)    |
| mean Rs_DC                          | 8.67 (1.42)           | 7.94 (1.24)         | 9.46 (1.60)    |
| Rs_DC asymmetry                     | 0.50 (0.77)           | 0.47 (0.64)         | -0.16 (0.78)   |

**Table 1.** Characteristics of the 3 groups after hierarchical clustering on the variables that served at the classification and also on absolute values of task-induced asymmetries. SENT\_CORE network asymmetry (left minus right) was calculated as the volumetric mean of the 18 hROIs in each contrast while hub asymmetry was calculated as the volumetric mean of the 3 hROIs classified as hubs in 145 right-handers (inferior frontal gyrus: F3t, and two regions of the superior temporal sulcus: STS3 and STS4). mIHHC corresponds to the averaged resting-state Inter Hemispheric Homotopic Correlation across the 18hROIs composing SENT\_CORE (Rs\_mIHHC). Resting-state Degree Connectivity (Rs\_DC) was calculated in the SENT\_CORE network in each hemisphere. Mean Rs\_DC corresponds to the mean of the left and right SENT\_CORE Rs\_DC.

**Table 2. Measures related to tasks execution in the 3 groups varying in hemispheric lateralization.** Mean (SD) of response times and self-reports of task difficulty rated on a 1 to 5 scale are shown for each fMRI run (Sentence production: PROD, sentence listening: LISN, sentence reading: READ). In addition, sample mean (SD) of the average number of words per sentence recalled during the debriefing of the PROD run is shown.

|                                     | TYP_STRONG<br>N = 125 | TYP_MILD<br>N = 132 | ATYP<br>N = 30 |
|-------------------------------------|-----------------------|---------------------|----------------|
| <b>Task difficulty</b>              |                       |                     |                |
| LISN                                | 1.12 (0.40)           | 1.14 (0.45)         | 1.25 (0.80)    |
| READ                                | 1.17 (0.40)           | 1.23 (0.55)         | 1.20 (0.43)    |
| PROD                                | 2.74 (1.07)           | 2.69 (1.06)         | 2.88 (1.10)    |
| <b>Response time (ms)</b>           |                       |                     |                |
| LISN                                | 388 (134)             | 386 (126)           | 396 (96)       |
| READ                                | 3733 (579)            | 3731 (560)          | 3755 (552)     |
| PROD                                | 5600 (850)            | 5631 (968)          | 5645 (1095)    |
| <b>Number of words per sentence</b> |                       |                     |                |
| PROD                                | 12.36 (2.03)          | 12.37 (1.87)        | 12.36 (2.55)   |

(all  $p < 0.001$ ), with the asymmetry during the latter being larger than that during the LISN<sub>SENT-WORD</sub> task (all  $p < 0.017$ ). Note that the “task” main effect was significant for both SENT\_CORE and SENT\_HUBS ( $p < 10^{-4}$ ).

There was a significant “language organization” by “handedness” interaction on SENT\_CORE ( $p = 10^{-4}$ ), although the interaction did not reach significance on SENT\_HUBS ( $p = 0.12$ ). In SENT\_CORE, this interaction was because the right-handed individuals in the TYP\_STRONG group had higher asymmetry strength than the left-handers ( $p = 0.03$ ), while the opposite pattern was observed in the ATYP group: left-handers had stronger asymmetry strength than right-handers (uncorrected  $p = 0.0075$ ). Note that there were no differences between right-handers and left-handers in the TYP\_MILD ( $p = 0.64$ ) and ATYP ( $p = 0.08$ ) groups. A similar pattern, although not reaching the significance threshold, was found in SENT\_HUBS.

There was no main effect of “handedness” on the absolute values of asymmetries with SENT\_HUBS ( $p = 0.94$ ), but there was a significant effect with SENT\_CORE ( $p = 0.0023$ ). Finally, there was no significant “language organization” by “handedness” by “task” triple interaction (SENT\_CORE:  $p = 0.29$ ; SENT\_HUBS:  $p = 0.57$ ).

### Intrinsic connectivity

In contrast to previous findings, there was no “handedness” main effect or “handedness” by “language organization” interaction on any of the SENT\_CORE intrahemispheric and interhemispheric intrinsic connectivity variables ( $p > 0.52$ ).

A significant main effect of “language organization” was observed on the mean resting-state interhemispheric homotopic correlation ( $R_s_{mIHHC}$ ,  $p = 0.0077$ ) due to significantly lower  $R_s_{mIHHC}$  in the TYP\_STRONG group than in the ATYP group ( $p = 0.01$ , see Table 1), while there were no significant differences between the TYP\_STRONG and TYP\_MILD groups ( $p = 0.12$ ) or between the ATYP and TYP\_MILD groups ( $p = 0.20$ ).

A significant main effect of “language organization” was observed on the average of the left and

**Figure 2. Intrahemispheric mean intrinsic connectivity strength of the SENT\_CORE network in the 3 groups differing in language organization.** Right (green) and left (red) values of the mean resting-state degree connectivity ( $R_s_{DC}$ ) of SENT\_CORE in the 3 groups. Significant leftward DC asymmetry is only present only in TYP groups (Tukey’s HSD test  $p < 10^{-4}$ , N TYP\_MILD = 132, N TYP\_STRONG = 125) and right  $R_s_{DC}$  is higher in the ATYP group (N = 30) than in the TYP\_STRONG and TYP\_MILD groups ( $p < 10^{-4}$ , Tukey’s HSD test). Error bars correspond to the 95% confidence intervals.

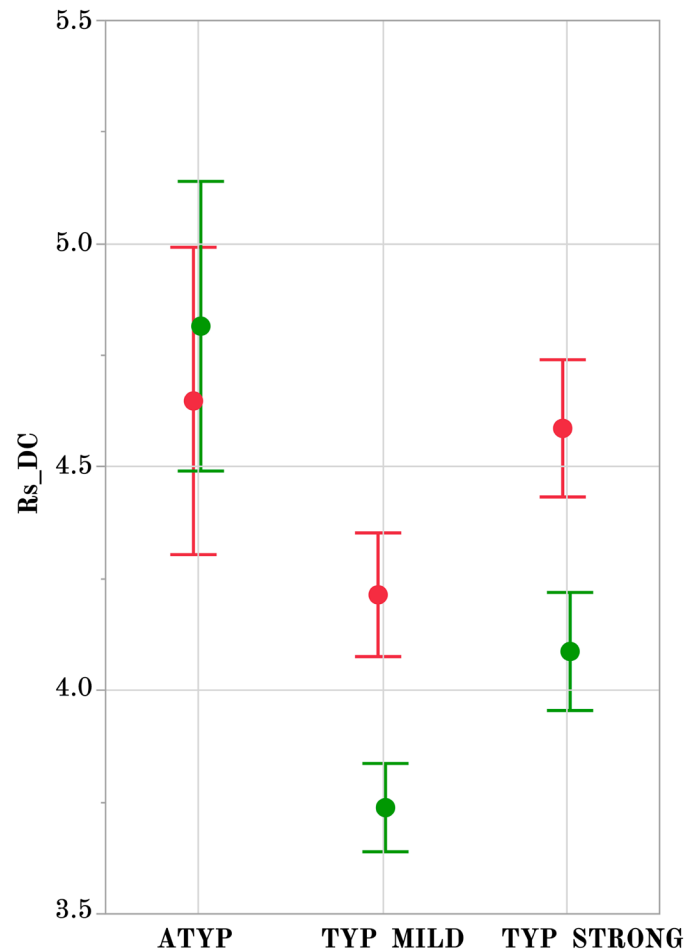

right intrahemispheric degree centrality ( $R_s_{DC}$ ,  $p < 10^{-4}$ ): the ATYP group showed a significantly higher average  $R_s_{DC}$  than either the TYP\_MILD ( $p < 10^{-4}$ ) or TYP\_STRONG ( $p = 0.013$ ) groups, while the TYP\_STRONG group had a significantly higher average  $R_s_{DC}$  than the TYP\_MILD group ( $p < 10^{-4}$ ).

A “language organization” by “side” interaction was also found to be significant on  $R_{s\_DC}$  ( $p < 10^{-4}$ ): the ATYP group showed no leftward asymmetry (asymmetry not significantly different from 0:  $p = 0.80$ ), in contrast to both the TYP\_STRONG and TYP\_MILD groups (significant leftward asymmetry: both  $p < 10^{-4}$ ), leading to significant differences between the ATYP group and the two other groups (both  $p < 10^{-4}$ ), while  $R_{s\_DC}$  leftward asymmetry was not different between the TYP\_MILD and TYP\_STRONG groups ( $p = 0.96$ ).

Inspection of the right and left  $R_{s\_DC}$  values in the 3 groups showed two different patterns depending on the considered hemisphere (Figure 2 and Table 1). In the left hemisphere, the TYP\_MILD group had a significantly lower  $R_{s\_DC}$  than the TYP\_STRONG group ( $p = 0.0018$ ) but was not different from the ATYP group ( $p = 0.063$ ), and the TYP\_STRONG group was not different from the ATYP group ( $p = 1$ ). In the right hemisphere (Figure 2), the ATYP group had very strong  $R_{s\_DC}$  values, which were larger than those in both the TYP\_MILD ( $p < 10^{-4}$ ) and TYP\_STRONG ( $p < 10^{-4}$ ) groups, whereas the TYP\_STRONG group showed significantly larger  $R_{s\_DC}$  values than the TYP\_MILD group ( $p = 0.0044$ ).

## Dissociations in asymmetry direction across tasks

### *Descriptive statistics*

Twenty-three individuals exhibited dissociation in their asymmetries induced by the 3 language tasks. These 23 individuals will be referred to as “CROSSED” and the others as “CONGRUENT”. The occurrence of CROSSED individuals within each lateralization group was higher in the ATYP group ( $N = 12$ , 40%) than in either the TYP\_MILD ( $N = 9$ , 6.82%,  $p < 10^{-4}$ ) or TYP\_STRONG ( $N = 2$ , 1.6%  $p < 10^{-4}$ ) groups, while the difference in the occurrence of dissociation between the TYP\_MILD and TYP\_STRONG groups failed to reach significance ( $p = 0.057$ ).

Seventeen of the 23 (74%) CROSSED participants were left-handed, a proportion significantly larger than that in the rest of the sample ( $p = 0.02$ ). Meanwhile, the gender ratio was not different from the rest of the sample (10 women, 43%;  $p = 0.60$ ).

Dissociations in the CROSSED\_ATYP individuals mostly corresponded to leftward asymmetry during  $PROD_{SENT\_WORD}$  together with rightward asymmetry during  $READ_{SENT\_WORD}$  and  $LISN_{SENT\_WORD}$ , and this pattern held for both SENT\_CORE and SENT\_HUBS (Figure 3). Only 3 of the 12 CROSSED\_ATYP individuals showed the reverse pattern of rightward asymmetry during  $PROD_{SENT\_WORD}$  together with leftward asymmetry during  $READ_{SENT\_WORD}$  and/or  $LISN_{SENT\_WORD}$  (see Figure 3).

The picture was very different for dissociations in TYP\_MILD individuals who were characterized by small rightward asymmetries mainly observed with

$READ_{SENT\_WORD}$  (only one participant had a strong negative asymmetry with  $READ_{SENT\_WORD}$  in SENT\_HUBS). Finally, the two dissociations observed in the TYP\_STRONG group were very weak negative asymmetries during  $LISN_{SENT\_WORD}$  regardless of the considered set of ROIs (see Figure 3).

There was a main effect of “dissociation” on the task-induced strength of asymmetry restricting the analysis to the ATYP and TYP\_MILD groups, where DISSOCIATED had lower asymmetry strength than CONGRUENT in both SENT\_CORE and SENT\_HUBS (both  $p < 0.013$ ), without any interaction with “task” or “language organization” (all  $p > 0.20$ ).

### *Dissociation and resting-state organization*

Considering the TYP individuals as a single group because they did not show any difference in  $R_{s\_DC}$  (i.e., the TYP\_MILD and TYP\_STRONG groups were merged), there was a significant “language organization” by “dissociation” interaction on the mean  $R_{s\_DC}$  value ( $p = 0.049$ ) due, in particular, to significantly higher mean  $R_{s\_DC}$  in the CROSSED\_ATYP individuals than in the CROSSED and CONGRUENT TYP individuals ( $p < 0.0027$ , for all post hoc tests corrected for multiple comparisons). The CONGRUENT\_ATYP individuals did not differ from the CROSSED or CONGRUENT TYP individuals (all  $p > 0.15$ ), and there was no difference between the CROSSED\_TYP and CONGRUENT\_TYP individuals ( $p = 0.92$ ). Note that there was no “dissociation” main effect (all  $p > 0.18$ ) and no “language organization” by “dissociation” by “side” interaction ( $p$  interaction = 0.60).

In contrast, there was a significant “language organization” by “dissociation” interaction on  $R_{s\_mIHHC}$  ( $p = 0.02$ , see Figure 4) due, in particular, to significantly higher  $R_{s\_mIHHC}$  in the CROSSED\_ATYP individuals than in the CROSSED\_TYP individuals (merging TYP\_MILD and TYP\_STRONG) that were not different in  $R_{s\_mIHHC}$  whether CROSSED or CONGRUENT ( $p < 0.016$  for all, post hoc tests corrected for multiple comparisons). The CONGRUENT\_ATYP individuals did not differ from the CROSSED or CONGRUENT TYP individuals (both  $p > 0.43$ ), nor did the CROSSED\_TYP and CONGRUENT\_TYP individuals differ ( $p = 0.91$ ).

## Hemispheric anatomical asymmetries and corpus callosum volume

The tissue compartment values for the four groups (TYP or ATYP by CROSSED or CONGRUENT) are provided in Table 3. Repeated measures MANCOVA of the GM<sub>asym</sub> and WM<sub>asym</sub> residuals (after adjusting these variables for sex, handedness, age, and total intracranial volume) showed a significant main effect of “language organization” ( $p = 0.02$ ). Post hoc t-tests showed that both GM<sub>asym</sub> and WM<sub>asym</sub> were smaller in the ATYP group than in the TYP group ( $p = 0.03$ ). There was no effect of “dissociation”

**Figure 3. Participants showing dissociations between their three task-related functional asymmetries in each of the 3 groups classified by language organization.** Individual values of left minus right blood oxygen level-dependent (BOLD) asymmetries measured during  $PROD_{SENT-WORD}$  (red),  $LISN_{SENT-WORD}$  (green) and  $READ_{SENT-WORD}$  (blue) in  $SENT\_CORE$  regions (top) and in  $SENT\_HUBS$  (bottom). The red dotted line corresponds to the arbitrary threshold of 0.05 in asymmetry strength that was applied to define a rightward asymmetry.

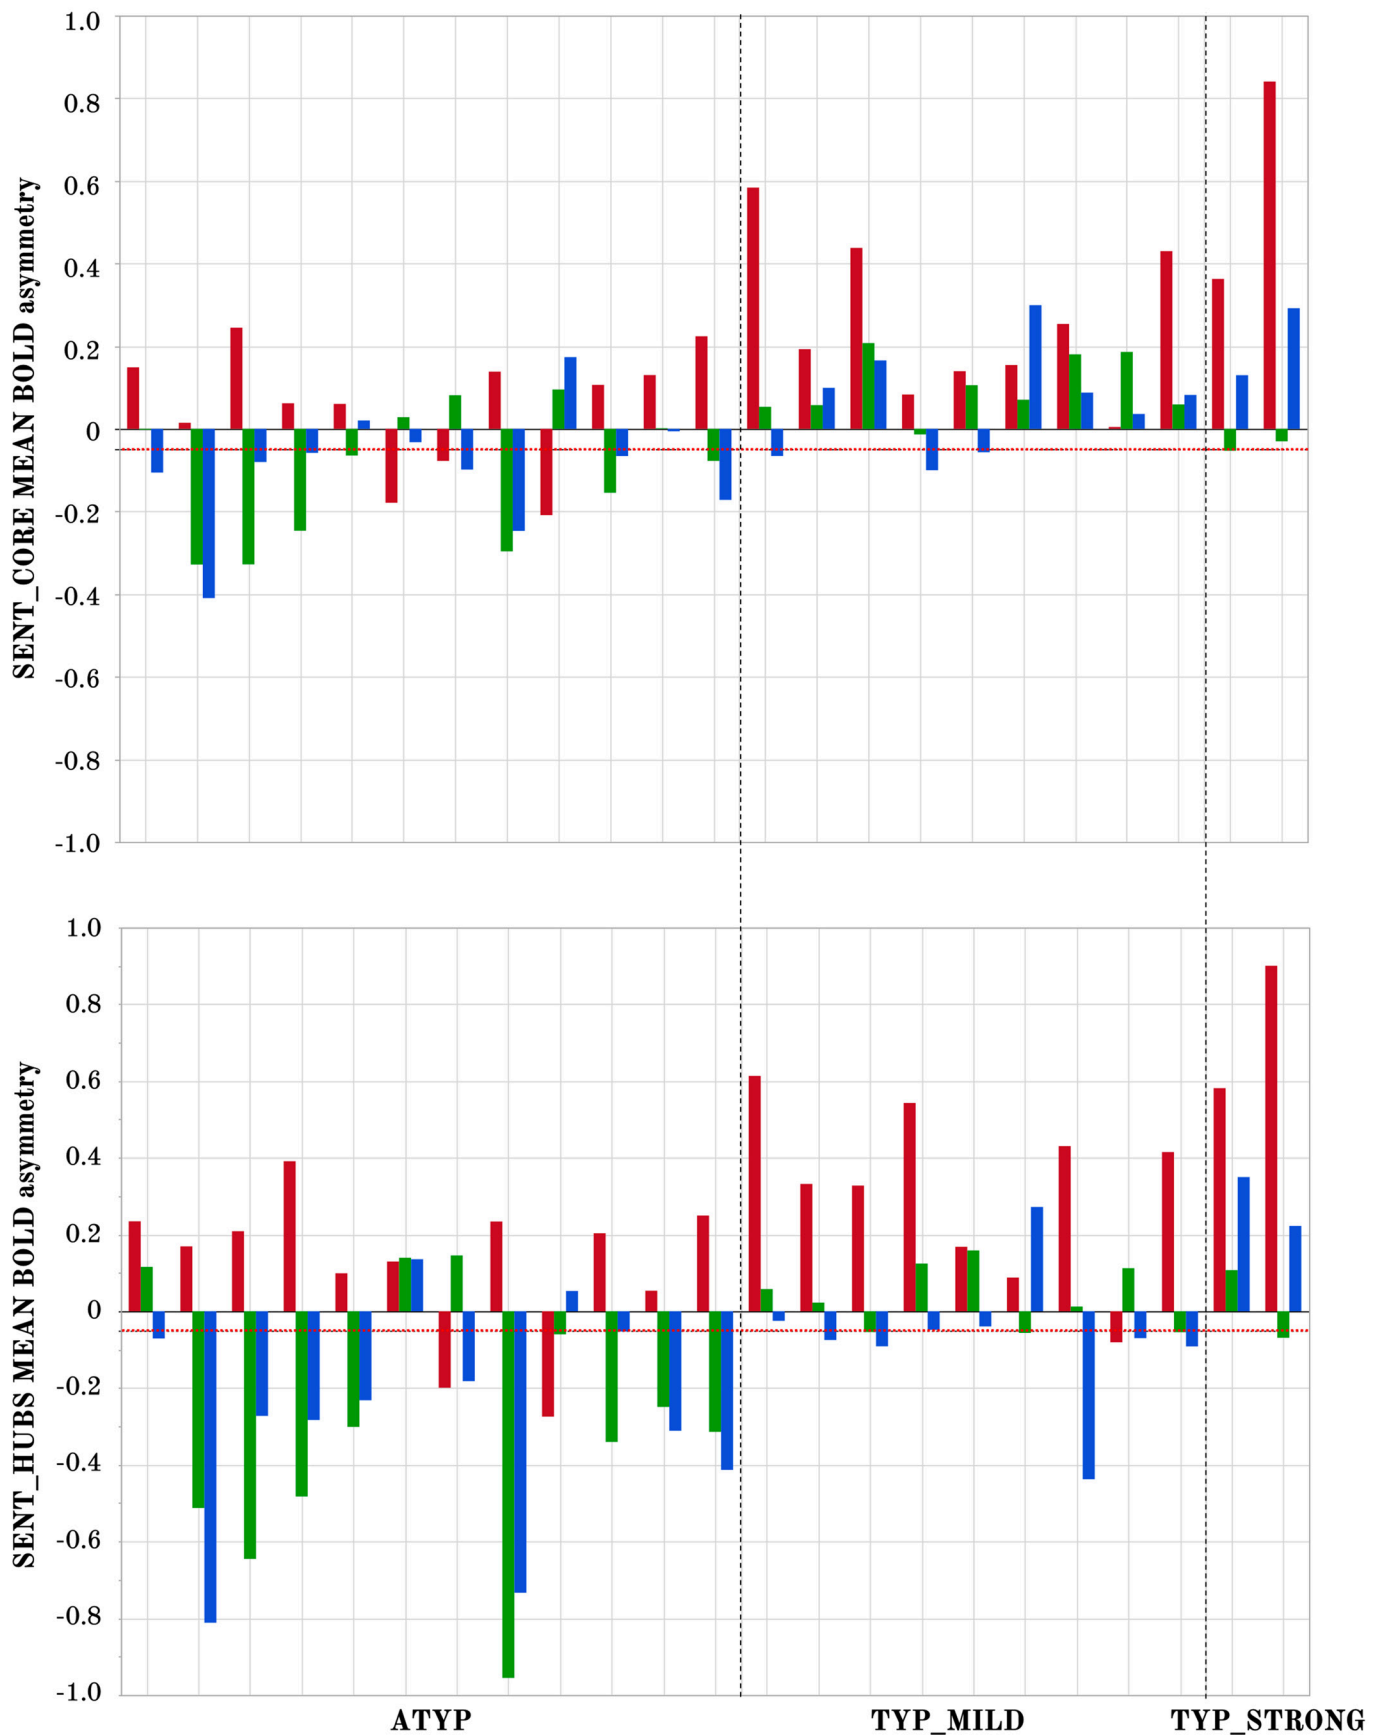



**Figure 4. Interhemispheric intrinsic connectivity strength across homotopic regions (Rs\_mIHHC) in SENT\_CORE in the CONGRUENT and CROSSED TYP and ATYP groups.** The estimated mean interhemispheric homotopic correlation expressed as the Fisher z-transformation of Rs\_mIHHC is higher in the CROSSED atypicals group (N = 12) than in the TYP group (merging TYP\_MILD and TYP\_STRONG, N CROSSED = 11, N CONGRUENT = 246), regarding of whether they are CONGRUENT or CROSSED (both  $p < 0.016$ , Tukey's HSD test).

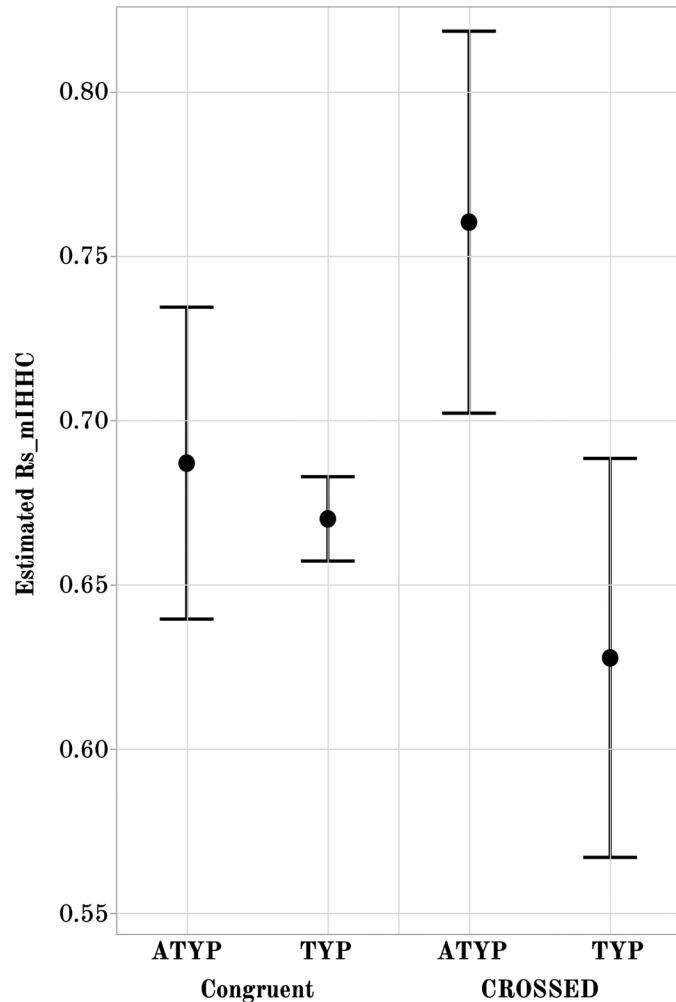

( $p = 0.99$ ) and no significant “language organization” by “dissociation” interaction ( $p = 0.36$ ). There was no interaction between “tissue compartment” (gray or white matter) and “language organization” ( $p = 0.92$ ) or between “tissue compartment” and “dissociation” ( $p = 0.26$ ), and there was no “tissue compartment” by “language organization” by “dissociation” triple interaction ( $p = 0.15$ ).

ANOVA of the CCvol residuals (after adjustment for the same covariates as for GMasym and WMasym) showed a significant “language organization” by “dissociation” interaction ( $p = 0.049$ ). Post hoc analyses showed that the CROSSED\_ATYP individuals had a larger CCvol volume than the CROSSED\_TYP individuals (uncorrected post hoc t-test:  $p = 0.037$ , HSD correction:  $p = 0.16$ ; see Table 1).

### Cognitive abilities

#### *Results of principal component analysis (PCA) of the 11 scores on the verbal and visuospatial tests*

The average scores for the 11 completed tests are presented for each group in Table 4. PCA applied to the residuals of the scores (after adjustment for age, sex, cultural level and handedness) uncovered 4 components that explained 49% of the total variance. The first component, which we will refer to as spatial (SPA), aggregated residuals of the mental rotation test, the Corsi block test, the maze test, and the Raven matrices (loadings: 0.62, 0.39, 0.60, and 0.68, respectively). The second component, labeled phonological (PHONO), mainly included the pseudoword and rhyming test residuals (loadings: 0.48 and 0.72, respectively) and, marginally, the vocabulary test (loading: 0.36). The third component was mostly an auditory verbal memory component (MEM), including

**Table 3. Grey and white matter hemispheric volumes and their left minus right asymmetry (mean and (SD), in cc) as well as midsagittal corpus callosum volume (mean and (SD), in cc), in subgroups of individuals according to their MMHC classification and the absence/presence of dissociated task-related functional asymmetries. TYP: participants classified with MMHC as either TYP\_STRONG or TYP\_MILD, i.e. showing typical left functional lateralization; ATYP: participants classified with MMHC as ATYPICAL, i.e. showing atypical right functional lateralization. CROSSED: participants with at least one dissociation of functional lateralization among the 3 language tasks; CONGRUENT: participants with no dissociation (MMHC: multitask multimodal hierarchical classification).**

|                        | TYP                  |                   | ATYP                |                   |
|------------------------|----------------------|-------------------|---------------------|-------------------|
|                        | CONGRUENT<br>N = 246 | CROSSED<br>N = 11 | CONGRUENT<br>N = 18 | CROSSED<br>N = 12 |
| <b>Grey Matter</b>     |                      |                   |                     |                   |
| Left                   | 327 (32)             | 337 (47)          | 337 (35)            | 317 (16)          |
| Right                  | 315 (32)             | 325 (48)          | 327 (33)            | 306 (15)          |
| Asymmetries            | 11.3 (4.0)           | 11.8 (4.5)        | 9.6 (5.0)           | 10.8 (3.8)        |
| <b>White Matter</b>    |                      |                   |                     |                   |
| Left                   | 216 (26)             | 221 (36)          | 222 (26)            | 208 (15)          |
| Right                  | 213 (25)             | 217 (35)          | 220 (25)            | 206 (14)          |
| Asymmetries            | 3.3 (2.1)            | 4.1 (1.7)         | 2.2 (2.4)           | 2.2 (2.0)         |
| <b>Corpus Callosum</b> | 5.3 (0.8)            | 5.2 (0.6)         | 5.4 (0.9)           | 5.4 (0.7)         |

|                            | TYP_STRONG<br>N = 125 | TYP_MILD<br>N = 132 | ATYP<br>N = 30 |
|----------------------------|-----------------------|---------------------|----------------|
| <b>Verbal tests</b>        |                       |                     |                |
| Key: word learning         | 65.9 (7.5)            | 65.0 (7.5)          | 64.7 (7.5)     |
| Pseudo-words learning      | 36.5 (10.4)           | 34.6 (11.1)         | 34.4 (9.6)     |
| Verbal fluency             | 48.1 (9.8)            | 46.5 (10.0)         | 47.6 (8.8)     |
| Reading span test          | 4.07 (1.08)           | 3.91 (1.11)         | 4.25 (1.11)    |
| Listening span test        | 4.85 (1.06)           | 4.57 (1.14)         | 4.63 (1.21)    |
| Vocabulary                 | 28.3 (3.7)            | 27.8 (3.7)          | 28.0 (4.4)     |
| Rhyming                    | 68.3 (4.5)            | 67.1 (6.1)          | 65.9 (5.6)     |
| <b>Visuo-spatial tests</b> |                       |                     |                |
| Mental Rotation Test       | 11.0 (4.2)            | 10.7 (4.6)          | 10.1 (4.6)     |
| Corsi block                | 5.99 (1.06)           | 5.72 (1.04)         | 5.73 (0.94)    |
| Maze                       | 6.68 (2.66)           | 6.09 (2.32)         | 4.42 (2.39)    |
| Raven matrix               | 111 (9.7)             | 109 (10.4)          | 106 (9.4)      |

**Table 4.** Mean (SD, in *ce*) of scores at the different tests of the cognitive battery in the 3 groups differing in their language organization as defined by a multitask multimodal hierarchical classification.

the auditory verbal word and pseudoword learning test residuals (loadings: 0.77 and 0.49, respectively). The fourth component was a verbal component (VERB) including all the verbal test residuals except those of the two learning tests, with the strongest loading being for the verb fluency test (0.64) and comparable loadings for each of the others (reading span test: 0.34, listening span test: 0.31, and vocabulary test: 0.31).

**Figure 5.** Loadings of the four main principal components of cognitive abilities in the 3 groups having different language lateralization. The color code for the components is as follows: SPA: blue, MEM: red, PHONO: light orange, and VERB: green. Bars represent 95% confidence intervals.

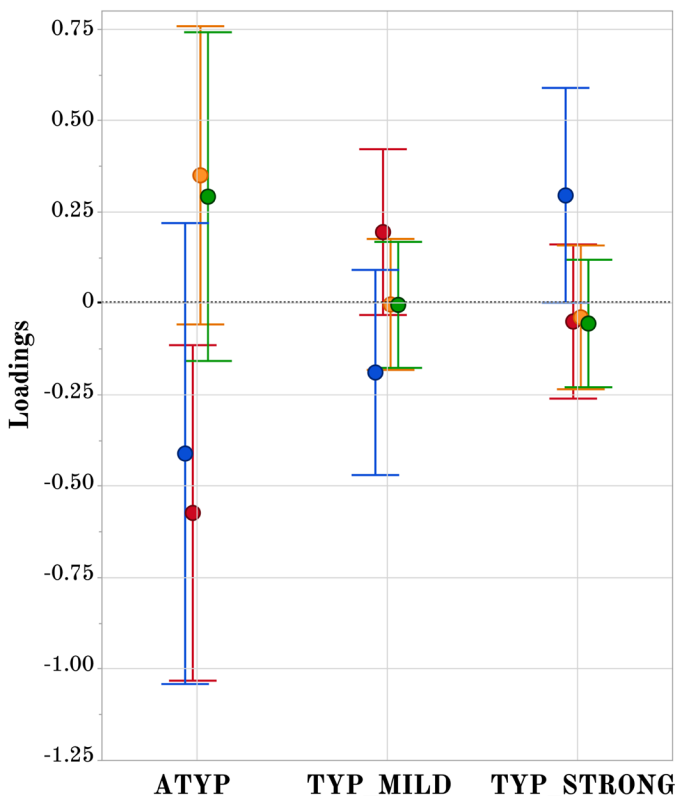

### Cognitive skills and language organization

Repeated measures MANOVA of the four PCA components (SPA, MEM, PHONO and VERB) revealed a significant “language organization” by “cognitive component” interaction ( $p = 0.0003$ ; Figure 5), while the “language organization” main effect was not significant ( $p = 0.21$ ).

Post hoc analyses showed that the “language organization” by “cognitive component” interaction was due to the difference in variation in SPA and MEM. The SPA scores were significantly higher in the TYP\_STRONG group than in the two other groups, but the scores were not significantly different between the latter (TYP\_STRONG:  $0.29 \pm 0.15$ ; TYP\_MILD:  $-0.19 \pm 0.14$ ; ATYP:  $-0.41 \pm 0.29$ ; uncorrected  $p < 0.0063$ ; TYP\_MILD versus ATYP,  $p = 0.39$ ). Meanwhile, the MEM scores were significantly lower in the ATYP group than in the two other groups (ATYP:  $-0.57 \pm 0.23$ ; TYP\_MILD:  $0.19 \pm 0.11$ ; TYP\_STRONG:  $0.05 \pm 0.11$ ;  $p < 0.043$ ). In addition, there was no effect of the “language organization” on the other two verbal components, namely, VERB and PHONO ( $p > 0.18$  and  $p > 0.13$ , respectively).

Finally, there was no relationship between dissociations and cognitive performance in either the ATYP or TYP\_MILD individuals ( $p = 0.17$ ).

### Comparison of different classifications for language lateralization

We compared the outcome of the present multimodal multitask hierarchical classification (MMHC) applied to the sample of 287 participants to those previously obtained with two different classifications based on the  $PROD_{SENT-WORD}$  contrast only; these classifications included 1) a Gaussian mixture modeling (GMM) of the HFLI observed for this contrast (Mazoyer et al., 2014) and 2) SVM classification of each hemisphere dominance based on the pattern of its voxels in the  $PROD_{SENT-WORD}$  contrast maps (Zago et al., 2017). The outcomes of the MMHC, GMM, and SVM classifications applied to the same sample of 287 participants are presented in Figure 6.

**Figure 6.** Alluvial plots comparing the present multimodal multitask hierarchical classification (MMHC) with two previous classifications only based on the functional asymmetry during production of sentences minus word-list in the same sample of participants: Gaussian mixture modeling (GMM) classification on hemispheric functional lateralization index (HFLI, Mazoyer et al., 2014) and support vector machine (SVM, Zago et al., 2017) classification in the right (SVM-R) and left hemisphere (SVM-L). Each line corresponds to a participant with the following color code: red for MMHC-atypical (ATYP), blue for MMHC-TYP\_MILD, and green for MMHC-TYP\_STRONG. The GMM method identified each individual as either strong\_atypical (SA), ambilateral (AMB), or typical (TYP). SVM identified the voxel-based pattern of each hemisphere of an individual as either dominant (DOM) or nondominant (NON DOM).

### LEFT-HANDERS

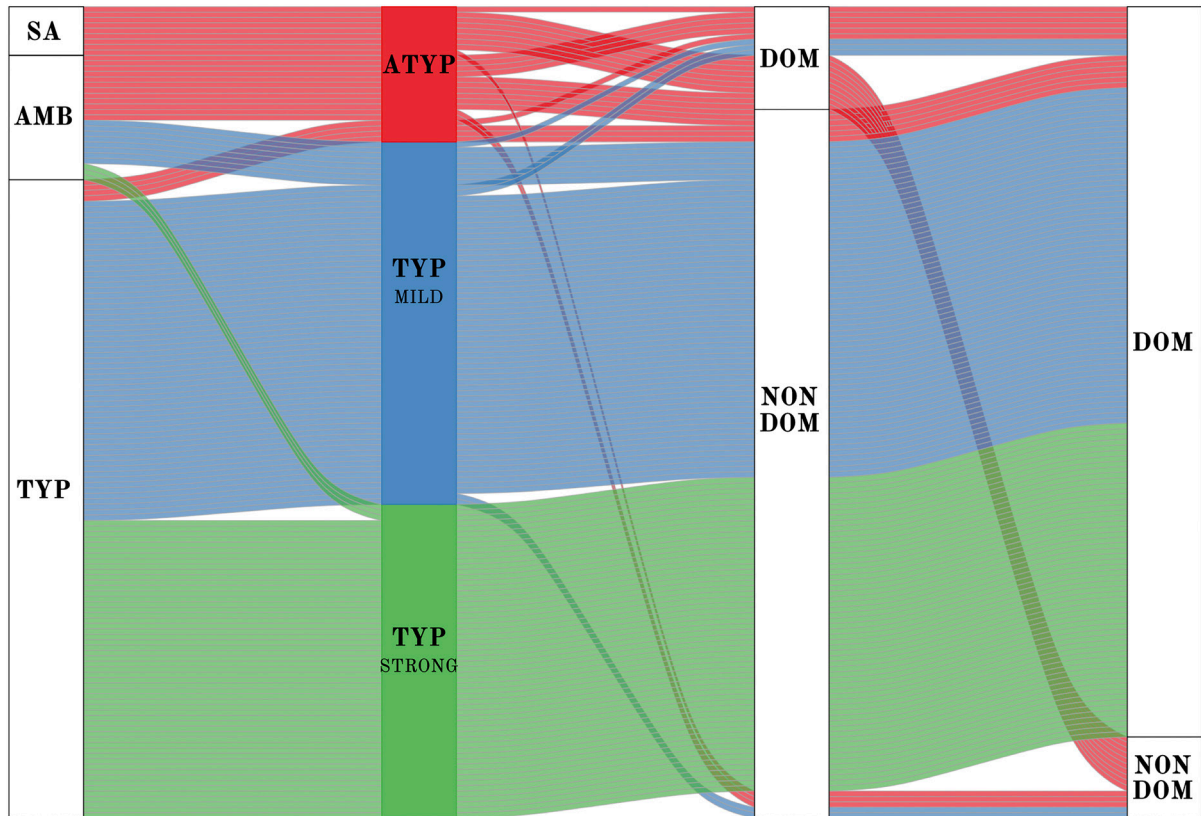

### RIGHT-HANDERS

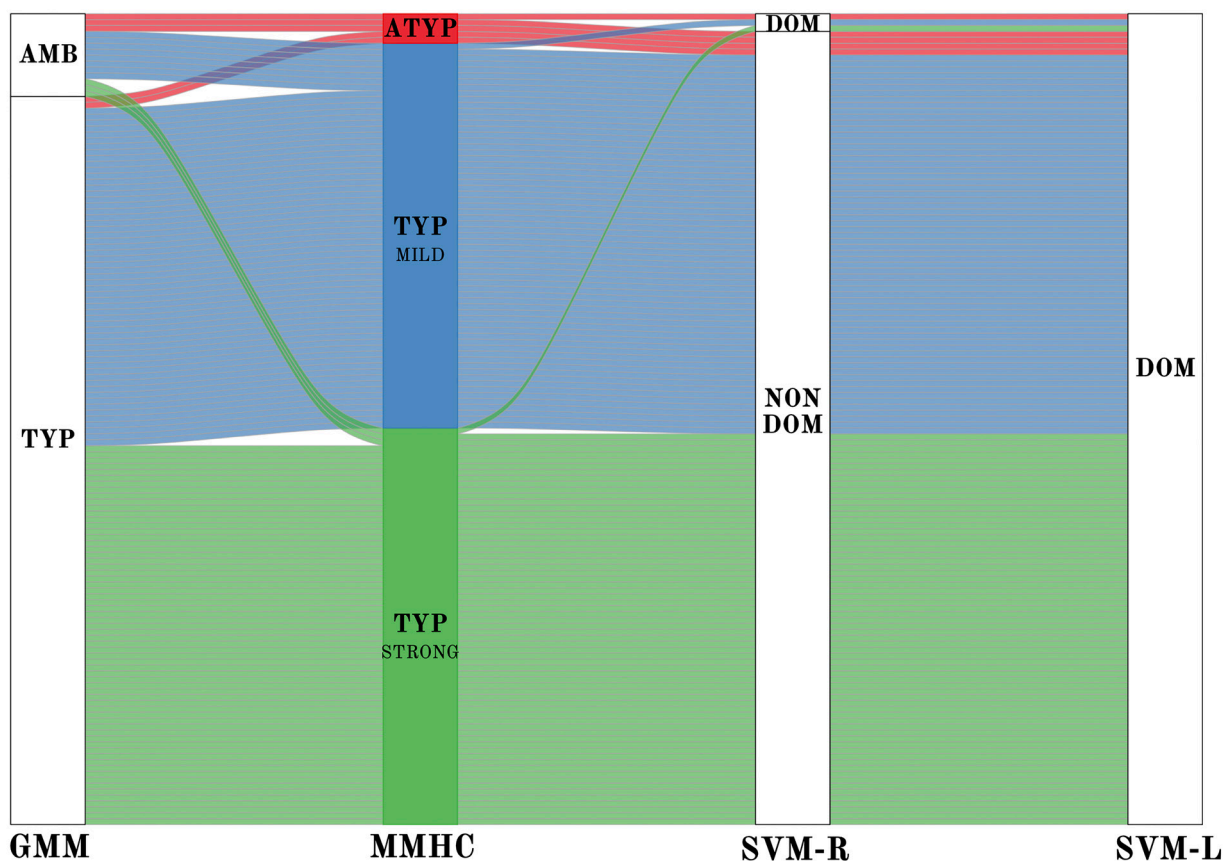

## *MMHC versus GMM*

There was a high concordance of classification of typicals with the two methods (98% of GMM typicals were classified as TYP\_MILD or TYP\_STRONG).

GMM identified 10 rightward lateralized left-handers (strong atypical; GMM-SA in Figure 6), among whom 9 completed the resting-state acquisition and were thus included in the present study. These 9 individuals were all clustered in the MMHC-ATYP group. We also found that 15 other individuals in the MMHC-ATYP group actually belonged to the ambilateral group identified by GMM (GMM-AMB in Figure 6) according to their weak  $PROD_{SENT-WORD}$  HFLI. The remaining 6 individuals in the MMHC-ATYP group were classified by GMM as typicals (GMM-TYP in Figure 6) because of their leftward HFLI during  $PROD_{SENT-WORD}$ .

The MMHC did not individualize any cluster resembling the group of 37 GMM-AMB identified in the Mazoyer et al. (2014) study. Rather, aside from the 15 aforementioned ambilaterals clustered in the ATYP group in the present study, the 22 other GMM-AMB were here classified either as TYP\_MILD (N=16) or TYP\_STRONG (N=6).

Note that whereas all GMM-SA were left-handers, 5 among the 135 right-handers (3.7%) were classified as ATYP with MMHC: 2 among these were dissociated with leftward lateralization during language production in SENT\_CORE and the SENT\_HUBS, leaving only 3 right-handers with atypical organization in the 3 tasks (2%). These 3 right-handers were not classified as strong-atypical by GMM but rather as ambilaterals because their HFLI for  $PROD_{SENT-WORD}$ , albeit negative, was above the threshold (-50) used for segregating strong atypicals from ambilaterals.

## *MMHC versus SVM*

Seventeen of the 30 MMHC-ATYP individuals (57%) had a right hemisphere labeled dominant by SVM. Conversely, the MMHC-ATYP cluster aggregated 77% of the 22 participants labeled as having a dominant right hemisphere. One should also note that 41% (7 among 17) of these right-hemisphere dominant ATYP individuals also had a left dominant hemisphere (i.e., were codominant), whereas the ATYP cluster aggregated 77% of the 12 participants labeled as having a codominant hemisphere. Notably, the 8 GMM-AMB left-handers classified as having a dominant right hemisphere pattern were classified MMHC-ATYP (Zago et al., 2017).

## SUMMARY OF THE RESULTS

In a sample of 287 healthy adults that included over 50% left-handers, a hierarchical classification based both on language task-induced asymmetries and on resting-state organization within

the SENT\_CORE network identified three clusters of individuals with different intra- and interhemispheric organization for sentence processing.

Two clusters of similar sizes aggregated 257 (90% of the sample) leftward lateralized individuals. The 132 TYP\_STRONG individuals (of which 46.4% were left-handers) were highly leftward lateralized for both task-induced asymmetry and intrahemispheric intrinsic connectivity, while showing low interhemispheric connectivity. This pattern of language organization was associated with strong leftward asymmetry of gray and white matter hemispheric volumes and with high visuospatial performance. The 125 TYP\_MILD individuals (including 50.7% left-handers) differed from the TYP\_STRONG individuals by their moderate leftward task-induced asymmetries, lower left hemisphere degree of connectivity and larger interhemispheric homotopic connectivity. The moderate leftward language organization in the TYP\_MILD individuals was more frequent in women and was associated with a larger occurrence of dissociations than in the TYP\_STRONG individuals (7% compared to 1.6%). Visuospatial cognitive abilities were lower in the TYP\_MILD group than in the TYP\_STRONG group.

The third (ATYP) cluster of 30 individuals included the highest proportion of left-handers (83%). Mean asymmetry in the ATYP group was rightward lateralized during the 3 language tasks, with a striking lack of differences in asymmetry strengths across tasks, in contrast to the two groups of typicals. Organization at rest in the ATYP group was marked by bilateral high intrahemispheric connectivity and strong interhemispheric connectivity. Such a low hemispheric specialization pattern was associated with a high occurrence of dissociations among the functional asymmetries in the 3 language tasks (40%), lower leftward asymmetries of gray and white matter hemispheric volumes, and when dissociated, larger corpus callosum volumes. Finally, the ATYP cluster showed lower verbal memory abilities than the two other clusters.

Comparison of the present classification to previous classifications based only on  $PROD_{SENT-WORD}$  revealed the importance of the multitask approach conjointly with resting-state measures of Rs\_DC in the language network to segregate the atypical within the individuals with low  $PROD_{SENT-WORD}$  hemispheric asymmetries.

## DISCUSSION

### **A multimodal multitask classification provides an enhanced definition of atypical language organization**

Compared to the high consistency of the classification of individuals having typical language organization, the definition of atypicality for language lateralization based on neuroimaging investigations is complex, and

the type of brain organization supporting language functions in atypical individuals is still not comprehensively understood.

All individuals having a rightward hemispheric lateralization of language production as measured with GMM were classified into the ATYP group in the present study, suggesting that having a rightward lateralization for production is a clear criterion of atypicality, as already validated by Wada studies (Dym et al., 2011). However, the present classification did not individualize a cluster resembling the group of 37 ambilaterals identified in Mazoyer et al. (2014), which indicated that not being clearly lateralized by production was not sufficient to ascertain atypicality. The difficulty in asserting language dominance in individuals with little fMRI lateralization during production is consistent with Bauer et al.'s meta-analysis showing that fMRI is more accurate in assessing language dominance in cases of strong leftward asymmetry (Bauer, Reitsma, Houweling, Ferrier, & Ramsey, 2013). However, the Bauer study involved patients suffering from epilepsy and thus likely to have language network reorganization.

To identify the discriminative variables that split the 37 ambilaterals into the 3 “language organization” groups, we conducted an additional analysis entering the 9 variables we used for the MMHC as repeated measures, and we found in the 37 individuals classified ambilaterals in Mazoyer et al. (2014) a very significant “language organization” main effect and interaction with the repeated measures (both  $p < 0.0001$ ). Post hoc analyses revealed that among these 37 ambilaterals, the 12 individuals classified as ATYP had significantly lower task-induced asymmetry in SENT\_HUBS and SENT\_CORE (all  $p < 0.001$ ) and a significantly lower Rs\_DC asymmetry ( $p = 0.002$ ) than those classified as TYP\_MILD or TYP\_STRONG. In contrast, there was no difference in averaged Rs\_DC or Rs\_mI-HHC values. These findings thus confirmed that, in order to comprehensively describe the dominance for language in individuals having low HFLI during language production, it is useful to apply a multitask battery as has been proposed by some authors (Baciu et al., 2005; Niskanen et al., 2012), which particularly allows the detection of individuals with dissociations as demonstrated by Baciu et al. (Baciu et al., 2003). Importantly, the present study also demonstrated that resting-state connectivity variables, measured at the language network level, particularly Rs\_DC asymmetry, in association with task-induced asymmetry, are of interest for the identification of atypical individuals.

In left-handers, a weak functional asymmetry during language production makes atypical organization with rightward asymmetry for other language components highly probable (80%), whereas the same weak functional asymmetry in right-handed individuals is associated with a typical leftward lateralization in most cases (86%). Such observations are consistent with

the classification by SVM showing that all ambilateral right-handers had a left hemisphere with a dominant pattern (Zago et al., 2017), whereas the 8 left-handed ambilaterals as classified with GMM and who had a dominant right hemisphere pattern with SVM, were classified into the ATYP group by the present method.

The fact that 80% of the ATYP individuals were left-handed is consistent with previous research showing that reverse lateralization is mainly seen in left-handers, whether in adults (Króliczak, Piper, & Frey, 2016; Somers et al., 2015) or in children (Szaflarski et al., 2011). Here, a right shift in hemisphere dominance for language was found in 12% of left-handers (when taking into account the different language components, as done in the present study), compared to only 6% when considering their HFLI for production only (Mazoyer et al., 2014). The difference between these two proportions provides an estimate of the decreased sensitivity when detection of atypicals among left-handers is performed using a production task only rather than a multitask multimodal approach as we implemented in the present study. The present multimodal classification identified 5 right-handed ATYP individuals (3.6%, compared to 16.7% of left-handers), a phenomenon as rare as the published case reports of crossed aphasia in right-handers (Alexander & Annett, 1996; Hindson, 1984) raising the question of whether this is a pathological state rather than part of interindividual variability of language organization (Coppens, Hungerford, Yamaguchi, & Yamadori, 2002). Among these 5 right-handed ATYP individuals, 3 had been previously classified as ambilaterals and 2 as typicals by GMM of the  $PROD_{SENT-WORD}$  HFLI, with the latter 2 individuals having negative asymmetries during  $LISN_{SENT-WORD}$  and  $READ_{SENT-WORD}$ . It is noticeable that these 5 right-handers had lower task-induced asymmetry strength than the 25 left-handed ATYP individuals, independent of the task, leaving open the question of whether right- and left-handed ATYP individuals are actually comparable.

Finally, the present classification sheds some light on the brain organization for language in individuals as defined by the SVM approach (Zago et al., 2017). Actually, the ATYP cluster aggregated 77% of the 22 participants labeled as having a right dominant hemisphere by SVM. This is very consistent with the high Rs\_DC found for the right SENT\_CORE network of the ATYP individuals. One should also note that 41% (7 among 17) of these right-hemisphere dominant ATYP individuals also had a dominant left hemisphere (i.e. were codominant), whereas the ATYP cluster aggregated 77% of the 12 participants labeled as having a codominant hemisphere. This strong association between atypicality and codominance is also consistent with the finding that ATYP individuals were characterized by high bilateral connectivity of their SENT\_CORE network, which is likely to reduce the

**Figure 7. Summary figure illustrating the different SENT\_CORE intra- and inter-hemispheric organizations observed in the 3 groups identified by hierarchical clustering.** The left column shows the group mean activation maps during  $PROD_{SENT\_WORD}$  (BOLD activation amplitude is given by color scale) of the left hemisphere and the right column the mean activation map of the right hemisphere superimposed on the white matter surface rendering of the BIL&GIN template obtained with the Surf Ice software (<https://www.nitrc.org/projects/surface/>). The second, third and fourth columns show the left lateral, superior and right lateral views of the SENT\_CORE intrinsic connectivity network, each region of the network being represented by a sphere located at the mass center of its MNI coordinates. For each SENT\_CORE region, a colored sphere indicate the group average region degree centrality of intrinsic connectivity (the  $Rs\_DC$  value is given by color scale, and sphere size is proportional to value), whereas a colored line indicates the strength of the Pearson intrinsic correlation coefficient between two SENT\_CORE regions (the  $Rs\_r$  value is given by color scale, and line thickness is proportional to value).

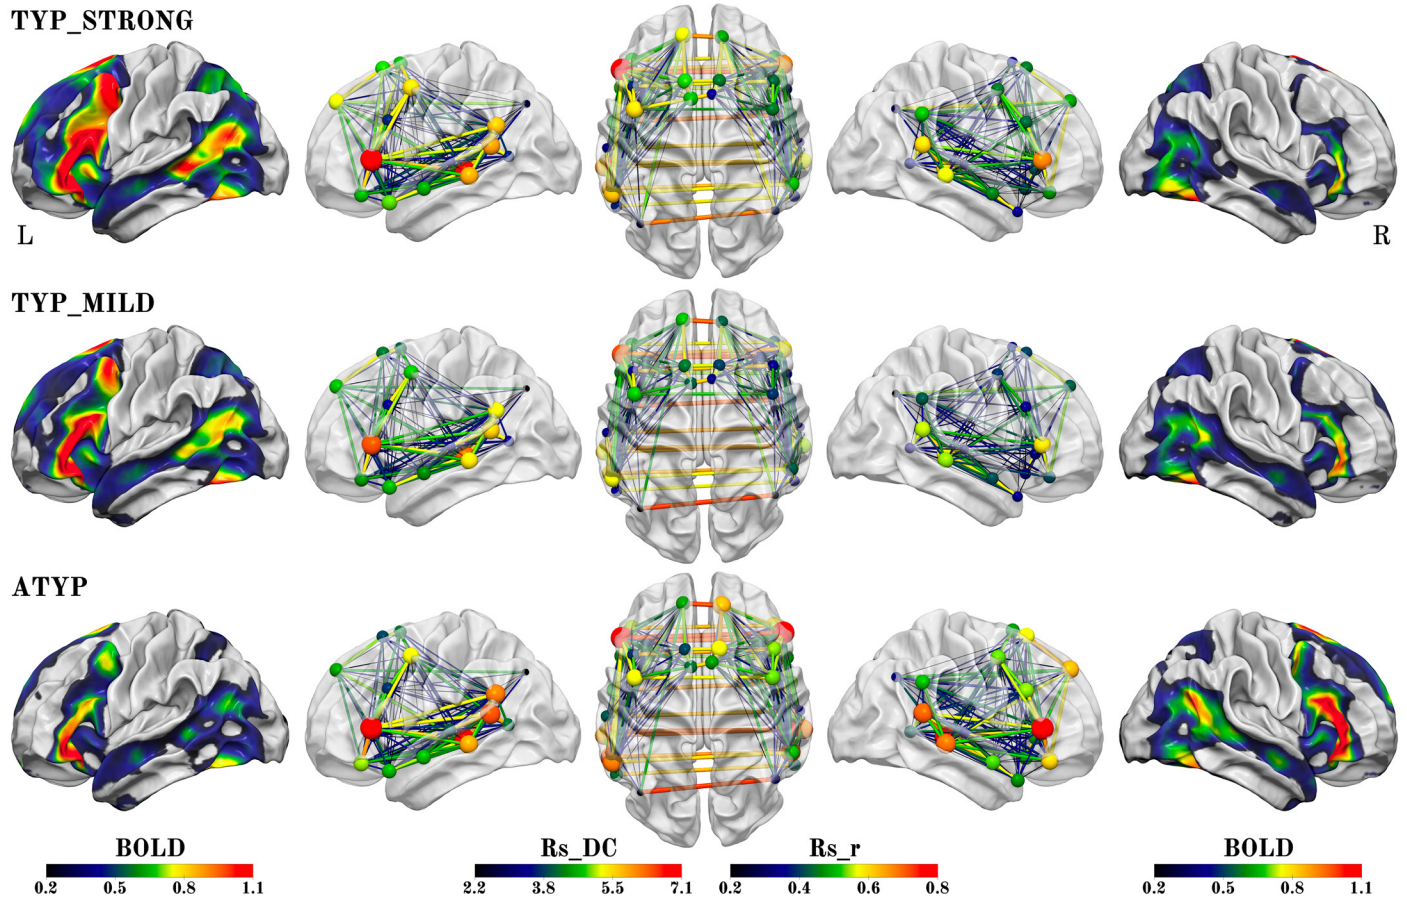

bias towards the dominance of a given hemisphere and attest to a more bilateral organization for language.

### **Organization of intrinsic connectivity in atypical individuals: although they show rightward task-induced asymmetries, their left hemisphere is also wired for language**

In a previous study, we noted that the 10 left-handers with strong rightward HFLI exhibited a pattern of regional asymmetries that was the reverse of the pattern observed in typical individuals (Tzourio-Mazoyer et al., 2016), a result in line with cortical stimulation findings suggesting that individuals shifting their dominant hemisphere actually have a reverse regional organization (Chang, Wang, Perry, Barbaro, & Berger, 2011; Drane et al., 2012). The present study results, although consistent with this view in terms of task-induced asymmetries, demonstrated that, by contrast, the SENT\_CORE network intrinsic connectivity properties of ATYP individuals did not mirror those of individuals with leftward task-induced

asymmetries. Although the mean of the group was strongly rightward asymmetrical in the 3 tasks, the ATYP individuals showed high and symmetrical  $Rs\_DC$  values, meaning that the SENT\_CORE network was highly connected in both hemispheres, and it is remarkable that their left hemisphere  $Rs\_DC$  value was not different from that of the TYP\_STRONG individuals, whereas their right hemisphere  $Rs\_DC$  value was higher than that of the TYP\_STRONG individuals (Figure 7).

The ATYP individuals thus had a significantly larger mean  $Rs\_DC$  value of SENT\_CORE in both hemispheres, making them highly connected individuals and suggesting that their left hemisphere could be organized in a way similar to that of the TYP individuals, i.e., as a potentially dominant hemisphere for language. In addition, the ATYP individuals showed the highest interhemispheric connectivity across SENT\_CORE homotopic areas, constituting a highly efficient network for sentence processing that straddled the 2 hemispheres. The fact

that even in individuals shifting their task-induced lateralization to the right, the left hemisphere is wired for high-order language processing leads to the hypothesis that the left hemisphere is the language hemisphere by default.

A trace of how ATYP individuals overcome the left hemisphere default-mode organization for language can be found in the loss of congruence in the sentence network at rest and during sentence processing. In right-handers, we observed a positive correlation across individuals between asymmetries of activations and  $R_{s\_DC}$  (Labache et al., 2019), while the ATYP group showed an absence of mean  $R_{s\_DC}$  asymmetry but mean rightward task-induced symmetries. Notably, both the CROSSED and CONGRUENT ATYP individuals had a left hemisphere  $R_{s\_DC}$  as strong as that in the TYP\_STRONG individuals, meaning that their left SENT\_CORE network connectivity was not different from that of strong leftward lateralized individuals (Figure 7) supporting the hypothesis that ATYP left hemisphere is wired for language as it is for typical individuals. Actually, ATYP differed from typicals in their right hemisphere organization at rest that exhibited a high strength of intrinsic connectivity, in agreement with their task-induced rightward activations (Figure 7).

The pattern of ATYP individual network intrinsic organization is thus a networking of both hemispheres profiled for the processing of high-order language, combined with strong anatomical and functional underpinning of interhemispheric interactions as evidenced by higher correlations across homotopic regions of SENT\_CORE and larger corpus callosum in the DISSOCIATED\_ATYP individuals.

The ATYP group also showed a more bilateral anatomical organization with decreased leftward gray and white matter hemispheric asymmetries likely to result in more flexibility in the side hosting the different language tasks and therefore allowing dissociations. In fact, the ATYP group hosted the largest proportion of participants showing dissociations and thus relying on one or the other hemisphere as the dominant hemisphere depending on the language component, which may be related to their stronger interhemispheric connectivity. Such a hypothesis was partly confirmed by the comparison of individuals with dissociations in the 3 groups that demonstrated that CROSSED ATYP individuals had significantly higher interhemispheric connectivity and more variation in the strength of asymmetries when DISSOCIATED than the two other groups.

These strong between-task differences in asymmetry strengths reflect an important shift in hemispheric control, which were particularly seen between  $PROD_{SENT\_WORD}$  and the two other tasks underpinned by the strong interhemispheric connectivity allowing for cooperation across the bilaterally located task-dependent dominant language networks.

## Two types of leftward organization for language, with an overrepresentation of women but not of left-handers in mildly lateralized typical individuals

The present segregation of leftward lateralized individuals in the two groups is consistent with the two Gaussian components of the  $PROD_{SENT\_WORD}$  HFLI distribution in typical individuals observed in our previous work (Mazoyer et al., 2014). However, these two Gaussian components showed too much overlap to allow a clear separation of the two groups of typical individuals. One original observation of the present study is thus the evidence of differences in terms of functional connectivity between two groups of typical individuals.

Although leftward lateralized and showing the same gradient of asymmetry across the 3 tasks, the TYP\_MILD individuals exhibited significant particularities in their inter- and intrahemispheric—although typical—intrinsic connectivity organization with lower asymmetries of task-induced activations but also lower  $R_{s\_DC}$  and higher  $R_{s\_mIHHC}$  within SENT\_CORE. In other words, their decreased strength in task-induced functional asymmetries was associated with an intra- versus interhemispheric intrinsic connectivity pattern showing less differentiation across hemispheres together with increased connection between them. Such a pattern of looser HSL in the TYP\_MILD group is consistent with a higher occurrence of dissociations than in the TYP\_STRONG group, although those dissociations were of moderate intensity and mainly observed for the reading task.

The proportion of women was larger in the TYP\_MILD cluster (58%) than in either of the two other clusters (38% in the TYP\_STRONG and 50% in the ATYP clusters), as well as in the whole sample (49%), consistent with previous reports of reduced language lateralization in women (Levy & Reid, 1978; McGlone & Davidson, 1973). Interestingly, gender differences in cluster constitution in the present work were present only in the two groups of typicals but not in the ATYP group.

Such a subtle association between sex and language lateralization may explain the inconsistency in the reports of a sex effect in HSL (Sommer, Aleman, Bouma, & Kahn, 2004) since, in contrast to handedness, it is not associated with the occurrence of critical changes in language lateralization. Actually, the proportion of left-handers was not increased in the TYP\_MILD group (compared to the TYP\_STRONG group), confirming that the relationship between handedness and language lateralization is better grounded in the large occurrence of left-handers among rightward lateralized individuals rather than by a decreased lateralization for language in left-handers (Mazoyer et al., 2014).

## **Dissociations of lateralization across language components are of a different natures in typical and atypical individuals with a particular status for the lateralization of reading**

Dissociations were detected with higher sensitivity when considering the SENT\_HUBS hROIs rather than the whole set of SENT\_CORE area ROIs. This is the reason why we considered a participant dissociated if they had opposed asymmetry across tasks on either one or both variables. The low incidence of dissociations that we observed in the TYP individuals and, in particular, in the TYP right-handers (4%) was consistent with the literature that reports rare cases of dissociations of production and comprehension in healthy right-handed participants (Jansen et al., 2006; Tzourio-Mazoyer et al., 2004). A point of interest was the occurrence of dissociation between the lateralization for reading and the lateralization for production and listening, which, to our knowledge, has not yet been reported. In leftward lateralized typical individuals, dissociations were mainly observed in the TYP\_MILD individuals for whom, as in the TYP\_STRONG individuals, reading was on average more lateralized than listening (although less than production).

Dissociations in this TYP\_MILD cluster more often involved reading (5 out of 9 in SENT\_HUBS; see Figure 3). Such a larger occurrence of dissociations involving reading may be related to the late acquisition of this language function. Indeed, the first phase of language development is perceptual, as revealed by studies showing that the auditory system of the fetus at 30 weeks' gestation is mature enough to detect complex sounds (McMahon et al., 2012) and to differentiate phonemes (Hepper & Shahidullah 1994). After only a few hours of postnatal exposure, newborns respond specifically to speech (Dehaene-Lambertz et al., 2002). Then, because of maturation of the vocal tract, the second phase is production (Mowrer, 1980). From the second half of the first year of life, the child enters the babbling phase proper and begins to make choices specific to the structures of his or her mother tongue at the prosodic, phonetic and syllabic levels (Oller, 1980). These first steps towards articulation are an essential step that reflects the existence of a functional link between the processes of perception and the production of vocal sounds and gives the child the opportunity to receive proprioceptive feedback (Rodgon, 1976).

While speech perception and production tightly codevelop very early in the establishment of language, reading is based on both the ability to hear and segment words into phonemes and then to associate these phonemes with graphemes, with the mapping of orthographic to phonological representations during reading being intrinsically cross-modal (McNorgan et al., 2014). In fact, reading develops in interaction with object recognition in the left fusiform gyrus

(Kassuba et al., 2011) and rightward lateralized visuospatial and visuomotor processes such as the saccadic system supporting eye movement during reading (Petit et al., 2009). More particularly, during reading, eye movements are not only an oculomotor ability but also the integration of visual and language processes at the word level and at the syntactic level (Yagle et al., 2017). In fact, reading depends on an alternation of fixations and saccades, the latter being defined as forward progressions or backward regressions. Even if forward progressions are the most common eye movements, backward regressions have been revealed to be correlated with the syntactic complexity of sentences, suggesting that these eye regressions depend on the relationships that the words making up the statement have to each other (Lopopolo et al., 2019). Thus, reading ability involves both visuospatial and language processes. Such a late specialization could lead to the possibility that different factors could intervene in the establishing of reading lateralization, with these factors being different from those acting during the first stages of language development.

The picture was very different for ATYP individuals, whose predominant dissociation pattern was a leftward lateralization for production and a rightward lateralization for both reading and listening (Figure 3, left). Considering the developmental timing of language components mentioned above, this could be an indication that ATYP lateralization for language perception and production is established early in different hemispheres. The second observation is that in the ATYP individuals, the lateralization of heteromodal areas during reading follows that of auditory sentence comprehension, demonstrating the prevalence of sensory integration over action in these individuals, which is different from the lateralization organization in the TYP\_MILD individuals. The fact that reading lateralization has different relationships with production and listening according to the sentence lateralization organization can provide new insight into the variability in the establishing of reading dominance and, potentially, a possible relationship between atypicality and dyslexia, since there is still a great debate between lateralization and reading impairments (Wilson & Bishop, 2018). Assessing the type of dissociations would be of great interest for shedding new light on language impairments.

The more frequent rightward lateralization during LISN than during PROD in the ATYP left-handers was consistent with the observation of Hécaen of a high occurrence of production deficits after left hemisphere lesions in left-handers, while comprehension deficits were rare (Hécaen et al., 1981). Such a dissociation corresponds to that of action versus perception as defined by Fuster (2009), with sentence reading and listening being colateralized. It is remarkable that, when compared to both typical groups, the ATYP group showed a decrease in (absolute value)



asymmetry strength that was larger for production than for the other tasks, leading to an absence of a difference between the asymmetries in production, listening, and reading. Such a diminished asymmetry during production is striking because of the link existing between hand preference and language production, with both functions being on the action side and being localized in close frontal areas. One should have expected left-handers to have stronger rightward asymmetry during language production than during the other tasks in relation to their left-hand dominance. This was not the case, even when considering only the CONGRUENT\_ATYP individuals.

However, handedness was associated with a stronger mean rightward asymmetry in the left-handed ATYP individuals and stronger leftward asymmetry in the right-handed TYP\_STRONG individuals, independent of the task, as if the hemisphere controlling the dominant hand is a slight attractor for language lateralization. This modest effect of handedness is consistent with the observation that patients who had suffered from right plexus brachial injury at birth, therefore disabled in the use of their right hand, present a shifting of their language production asymmetries towards the right hemisphere, although without a complete shift (Auer et al., 2009).

### **Are different language organizations associated with differences in cognitive abilities?**

Better visuospatial performance was present in the TYP\_STRONG individuals, who had the largest between-hemisphere differences and lower interhemispheric connectivity. Such a result suggests that the better spatial abilities reported in right-handers in a meta-analysis (Somers, Shields, Boks, Kahn, & Sommer, 2015) might have been related to the fact that the TYP\_STRONG group hosted the highest proportion of right-handers. The present results suggest that strong leftward lateralization of both language task-induced and resting-state connectivity asymmetries in the core language network is associated with better visuospatial performance, as if less involvement of the right hemisphere in sentence processing was facilitating visuospatial processing. Such an observation can be viewed as an argument in favor of the “crowding effect” theory stating that an optimal split of functions across the two hemispheres facilitates cognitive functioning (review in Vingerhoets, 2019). Of course, further exploration of the relationships between the different aspects of visuospatial cognitive abilities and the strength of both leftward lateralization for language and rightward lateralization for visuospatial functions, as well as their interindividual variability, is needed to confirm this hypothesis.

Decreased verbal memory abilities in the ATYP group suggest that the reorganization occurring on top of the language organization by default in this group is at the cost of suboptimal cognitive functioning, while

mild, although leftward, lateralization for language appears to be as efficient for language processing as strong leftward lateralization. Considering that the ATYP group included 15 of the ambilateral individuals defined in Mazoyer et al. (2014), the present observation is consistent with those of Mellet et al reporting lower performance in ambilaterals (Mellet et al., 2014) concerning both verbal memory and visuospatial abilities.

## **CONCLUSIONS**

Based on the joint investigation of language task-induced asymmetries and intrinsic connectivity strength in the sentence-processing supramodal network, we show that individuals with atypical rightward language lateralization do not rely on an organization that simply mirrors that of typical leftward lateralized individuals.

Actually, the resting-state organization in the atypicals showed that their sentence processing was underpinned by left and right networks both wired for language processing and highly interacting by strong interhemispheric intrinsic connectivity and larger corpus callosum volume. Such a loose HSL permits the hosting of language in either the left and/or right hemisphere as assessed by a very high incidence of dissociations across various language task-induced asymmetries in this group.

The fact that these individuals had lower leftward gross macroscopical hemispheric anatomy than typical individuals suggests that such organization was supported, at least in part, by early developmental events resulting from a different trajectory or from the occurrence of plastic changes. Support for the hypothesis of the early establishment of this atypical organization comes from the coinvestigation of the lateralization of production and comprehension with reading. In atypicals, dissociations were observed between sentence production and comprehension (whether read or listened to), two functions known to be tightly coupled and early developing. By contrast, the rare dissociations found in typicals occurred for reading, a later acquired competence. Moreover, atypical organization occurring mainly in left-handers has a cost in terms of language abilities with less efficient verbal memory.

Finally, the present results argue for multitask measures of language lateralization for evaluating HSL in individuals with low lateralization for language production, especially if they are left-handed.

## MATERIALS AND METHODS

### Participants

The study sample was part of the BIL&GIN database that has been fully described elsewhere (Mazoyer et al., 2016). Briefly, 287 healthy participants of the BIL&GIN (150 left-handed, 140 women, 72 left-handed women) who completed the fMRI battery, including several language tasks and a resting-state acquisition, were included in the present work. The sample mean age was 25.8 years (SD = 6.5 years). The mean educational level of the participants was 15.6 years corresponding to almost 5 years education after the French baccalaureate (SD = 2.3 years).

For each participant, we recorded self-reported handedness and manual preference (MP) strength assessed with the Edinburgh inventory (Oldfield, 1971). Left-handed participants had an Edinburgh score of -63.2 (SD = 39.9).

### Participants' cognitive evaluation

Participants' verbal abilities were evaluated with the following battery of seven tests: 1) a supraspan recall test of an 18-word list (Van der Elst, van Boxtel, van Breukelen, & Jolles, 2005) for verbal memory evaluation; 2) a supraspan recall test of a list of 15 pseudo-words for verbal memory evaluation with minimal semantic associations; 3) a verb generation test for semantic verbal fluency exploration; 4) a synonym finding test for estimating vocabulary extent (Binois & Pichot, 1956); 5) a listening span test based on spoken sentences; 6) a reading span test based on read sentences for verbal working memory assessment (Daneman & Carpenter, 1980; Desmette, Hupet, Schelstraete, & Van der Linden, 1995) and 7) a rhyming test on 80 visually presented pairs of pseudo-words for evaluation of graphophonemic conversion ability.

Visuospatial abilities were assessed with the following four tests: 1) The Mental Rotation Test (MRT), which estimates the ability to rotate and spatially manipulate mental images (Vandenberg & Kuse, 1978); 2) the Corsi Block test, which evaluates visuospatial short-term memory abilities (Della Sala, Gray, Baddeley, Allamano, & Wilson, 1999); 3) a home-made 3D maze test for evaluating topographic orientation skills; and 4) the Raven matrix for assessing non-verbal reasoning.

### Language tasks completed during fMRI

The language fMRI paradigm has been fully described elsewhere (Labache et al., 2019). In short, three fMRI runs were completed by the participants, each including a sentence-level task and a word-list reference task corresponding to randomized alternation of event-related trials. Within each trial, the participant was shown for 1s either a line drawing (taken from the "Le Petit Nicolas" comic strip series) or a scrambled drawing, that was immediately followed by

a central fixation crosshair. While fixating the cross, the participant performed either the sentence task or the word-list reference task.

During the production run (PROD), after seeing a line drawing, the participant was instructed to covertly generate a sentence beginning with a subject and a complement, followed by a verb describing the action taking place and ending with an additional complement of a place or a manner. When a scrambled drawing was displayed, the subject was asked to covertly generate the list of the months of the year.

During the listening run (LISN), whenever a Petit Nicolas line drawing was displayed, the subject was instructed to carefully listen to a sentence dealing with the line drawing and to click at the end of the sentence. When a scrambled drawing was displayed, he/she was instructed to listen to the list of the months, days of the week and/or seasons and click at the end of the list.

During the reading run (READ), like in the two other tasks, whenever a line drawing was displayed, the subject was instructed to read a sentence based on the outline drawing. When a scrambled drawing was displayed, he/she was instructed to read the list of months, days of the week and/or seasons.

### Tasks execution and performance

The response times corresponding to the end of the sentence production, sentence listening and sentence reading were recorded for each participant during the fMRI session, and right after the fMRI session, the participants were asked to rate the difficulty of each of the tasks on a 5-level scale (1:easy to 5:very difficult). For the production run, each participant was asked to recall and write down, whenever possible, the sentence he/she elaborated when presented with each image, the average number of words per (recalled) sentence being then computed.

### Image acquisition and processing

#### *Image acquisition*

Imaging was performed on a Philips Achieva 3 Tesla MRI scanner (Philips, Erlangen, The Netherlands).

The structural MRI protocol consisted of a localizer scan, a high resolution three-dimensional T1-weighted volume (sequence parameters: TR 20 ms; TE 4.6 ms; flip angle 10°; inversion time 800 ms; turbo field echo factor 65; sense factor 2; field of view 256x256x180 mm<sup>3</sup>; 1x1x1 mm<sup>3</sup> isotropic voxel size) and a T2\*-weighted multi-slice acquisition (T2\*-weighted fast field echo (T2\*-FFE), sequence parameters:TR = 3,500 ms; TE = 35 ms; flip angle = 90°; sense factor = 2; 70 axial slices; 2 mm<sup>3</sup> isotropic voxel size).

Language task-related functional volumes were acquired using a T2\*-weighted echo-planar echo-planar imaging (EPI) sequence (TR = 2 s; TE = 35 ms; flip angle = 80°; 31 axial slices with a

240 x 240 mm<sup>2</sup> field of view and 3.75x3.75x3.75 mm<sup>3</sup> isotropic voxel size). In the three runs, 192, 194 and 194 T2\*-weighted volumes were acquired for the production, listening and reading sentence tasks, respectively.

Resting-state functional volumes (N = 240) were acquired as a single 8 minutes long run using the same T2\*-weighted EPI sequence. Immediately prior to scanning, the participants were instructed to “*keep their eyes closed, to relax, to refrain from moving, to stay awake and to let their thoughts come and go*”.

### *Processing of structural images*

For each participant, (1) the T2\*-FFE volume was rigidly registered to the T1-MRI; (2) the T1-MRI was segmented into three brain tissue classes (grey matter, white matter, and cerebrospinal fluid) and normalized to the BIL&GIN template including 301 volunteers from the BIL&GIN database using the SPM12 “segment” procedure (<http://www.fil.ion.ucl.ac.uk/spm/>) with otherwise default parameters. Whole volumes of these three compartments were extracted and brain volume calculated as their sum. In addition, hemispheric volumes (left and right) of grey and white matter were extracted to compute their asymmetries (Table 3).

A semi-automated in-house corpus callosum segmentation procedure was then applied to extract individual masks of corpus callosum obtained from 10 consecutive mid-sagittal slices of 1mm width on individual white matter maps in the MNI stereotactic space. An additional processing step to remove the fornix, which was sometimes segmented and connected along with the corpus callosum, was added. Quality control of corpus callosum segmentation was achieved by visual inspection of all slices, and, when needed, manual corrections for minor segmentation error was applied using FSL software. Each individual corpus callosum mask was then applied to each participant’s normalized and modulated white matter partition images to estimate individual corpus callosum volume (Table 3).

### *Pre-processing of task-related and resting-state functional volumes*

Functional data were corrected for slice timing differences. To correct for subject motion during the runs, all T2\*-weighted volumes were realigned using a 6-parameter rigid-body registration. The EPI-BOLD scans were then registered rigidly to the structural T2\*-FFE image. The combination of all registration matrices allowed for warping the EPI-BOLD functional scans from the subject acquisition space to the standard space (2x2x2 mm<sup>3</sup> sampling size) with a single interpolation.

Time series of BOLD signal variations in white matter and cerebrospinal fluid (individual average time series of voxels that belonged to each tissue class) as well as temporal linear trends were removed from the

rs-fMRI data series using a regression analysis. Additionally, rs-fMRI data were bandpass filtered (0.01 Hz - 0.1 Hz) using a least-squares linear-phase finite impulse response filter design.

## **Language task-fMRI processing**

### *Language task contrast maps*

Statistical parametric mapping (SPM12, <http://www.fil.ion.ucl.ac.uk/spm/>) was used for processing the task-related fMRI data. First, a 6-mm full width at half maximum (FWHM) gaussian filter was applied to volumes acquired during each run. For each participant, differences between BOLD signal volumes corresponding to sentence and list belonging to the same run were computed, namely sentence minus word-list production ( $PROD_{SENT-WORD}$ ), sentence minus word-list reading ( $READ_{SENT-WORD}$ ), and sentence minus word-list listening ( $LISN_{SENT-WORD}$ ).

### *Regions of interest analysis using the SENSAAAS atlas*

BOLD signal variations during the 3 language tasks and resting-state and their asymmetries were then computed for the set of 18 pairs of homotopic frontal and temporal regions of interests (hROIs) that we previously identified in the subgroup of 144 right-handers as constituting a core network of language areas (SENT\_CORE, Figure 1 (Labache et al., 2019)). These 18 hROI-pairs were selected as activated and leftward asymmetrical in these same 3 tasks and as constituting at rest a network with strong positive correlations across the hROIS. Note that SENT\_CORE areas contain the antero-posterior high-order language areas, consistent with language meta-analyses of healthy individuals (Price, 2010; Price, 2012; Vigneau et al., 2006), including 3 intrinsic connectivity hubs corresponding to the inferior frontal gyrus (F3t) and two regions of the superior temporal sulcus (STS: STS3 and STS4 Figure 1).

Here, for each participant, each of the 3 contrast maps, and each of these 18 hROIs, left and right BOLD signal variations were computed by averaging the contrast BOLD values of all voxels located within the hROI volume. Then, for each participant and each contrast map, mean left and right BOLD variations and asymmetry for the whole network were also computed as a weighted (by volume) average of the corresponding 18 hROIs values (SENT\_CORE), as well as the mean of the 3 hubs (SENT\_HUBS).

## **Resting-state organization of SENT\_CORE network**

For each individual and each hROI composing the SENT\_CORE network, we computed a degree centrality ( $R_s_{DC}$ ) in each hemisphere. The  $R_s_{DC}$  in each participant and each hROI of each hemisphere was

calculated as the sum of the positive correlations existing between one hROI and all the other hROIs of the SENT\_CORE network. Rs\_DC values were then averaged across the 18 hROIs of the same hemisphere and the resulting left and right averaged Rs\_DC values were summed and divided by 2 so as to provide an average SENT\_CORE intra-hemispheric Rs\_DC characterizing the strength of within hemisphere intrinsic connectivity for this network. We also computed the left minus right difference of the averaged Rs\_DC values as a measure of the asymmetry in intra-hemispheric connectivity strengths for the SENT\_CORE network.

Interhemispheric connectivity strength was estimated in each individual by the average across the 18 hROIs pairs constituting the SENT\_CORE network of the z-transformed intrinsic correlation coefficient between homotopic ROIs (mean Inter-Hemispheric Homotopic Correlations, Rs\_mIHHC).

## Statistical analysis

### *Identification of groups of individuals with different brain organization for language through hierarchical clustering*

Hierarchical classification was completed with R (R version 3.5.1; R Core Team, 2013), while other statistical analyses were performed using JMP15 (<http://www.jmp.com>, SAS Institute Inc., 2018).

The study sample was segregated in groups varying in their intra- and interhemispheric organization in SENT\_CORE using an agglomerative hierarchical clustering procedure. The variables entered in this procedure were both functional asymmetries induced by each of the 3 language tasks and intra- and interhemispheric SENT\_CORE intrinsic connectivity metrics.

Task-induced functional asymmetries were obtained both at the SENT\_CORE level, because of the low intersubject variability that results from averaging over the whole set of 18 ROIs, and at the SENT\_HUBS level (i.e., when averaging asymmetries over 3 hubs: F3t, STS3 and STS4) because, although more variable across individuals, this hub-averaged asymmetry involves supramodal regions having a key role in the sentence core network (see (Labache et al., 2019)). There were thus 6 variables for task-induced activation: the SENT\_CORE and SENT\_HUBS asymmetries for  $LISN_{SENT-WORD}$ ,  $PRODS_{SENT-WORD}$  and  $READ_{SENT-WORD}$ .

To investigate both the intrahemispheric integration in the language networks and the interhemispheric differences, we included in the hierarchical classification the sum of the two hemisphere Rs\_DC values (left Rs\_DC + right Rs\_DC) and the Rs\_DC asymmetry (left Rs\_DC - right Rs\_DC) calculated in SENT\_CORE. To account for interhemispheric intrinsic connectivity strength, we included the mean of the interhemispheric SENT\_CORE homotopic correlation

(Rs\_mIHHC).

These 9 variables were standardized before being jointly entered into an agglomerative hierarchical classification (Sneath & Sokal, 1973) that used the Euclidean distance for computing the dissimilarity matrix and the Ward distance (Ward Jr, 1963) to aggregate the different participants into clusters using the “*hclust*” function provided by default in R. The optimal number of clusters was determined using the R library “*NbClust*” (Charrad, Ghazzali, Boiteau, & Niknafs, 2014). This package provides 30 statistical indices for determining the optimal number of clusters and offers the best clustering scheme from the different results obtained by varying all combinations of the number of clusters for the chosen method, in this case, hierarchical clustering with Ward’s distance. We selected the number of clusters that satisfied a maximum of indices and found it to be equal to 3.

### *Identification of individuals with dissociations of lateralization across tasks*

In a second step, we identified individuals exhibiting at least one dissociation in their lateralization among the 3 language tasks, which means those who exhibited SENT\_CORE functional asymmetries larger than 0.05 in amplitude in the opposite direction in one task compared to the others. We also searched for individuals exhibiting a dissociation in their SENT\_HUB asymmetries, which led to the definition of two categories of individuals: 1. those exhibiting a dissociation for either SENT\_CORE or SENT\_HUB or both, who were named “CROSSED”; 2. those showing either leftward lateralization for all tasks for both SENT\_CORE and SENT\_HUBS or right lateralization for all tasks for both SENT\_CORE and SENT\_HUBS, who were named “CONGRUENT”.

Pearson’s chi-square tests were conducted to compare the proportion of “dissociation” across the clusters identified by the classification.

## **Characterization of the groups provided by the classification with different brain organization of the language network**

### *Task performance, demography and handedness*

To ensure that potential differences in the asymmetries measured during the language tasks were not related to group differences in task execution time that was recorded during the task-induced fMRI session, response times were compared across “language organization” groups (corresponding to the clusters of the hierarchical classification) taking into account sex, age, and brain volume. In addition, within each “language organization” group, we compared the groups of “CONGRUENT” and “CROSSED” individuals.

The different “language organization” groups were compared with variables known to be associated

with variability in language lateralization, namely, handedness, sex, age, and brain volume. To complete these analyses, Pearson's chi-square tests were applied for discrete variables (handedness and sex) and ANOVA with Tukey's HSD post hoc tests for continuous variables (age and brain volume).

### *Task-induced and resting-state organization of the SENT\_CORE network in groups varying in their language network organization*

We first comprehensively described the different types of organization of the sentence networks in the groups issued from the hierarchical classification.

We used two repeated measures MANOVA to examine the task-induced asymmetries within SENT\_CORE and SENT\_HUBS in the 3 language tasks searching for "task" (3 levels), "language organization" (3 levels, that is, a number of levels corresponding to the number of identified clusters) and "handedness" main effects and their interactions.

Note that to ensure that this between-group difference was not due to a difference in the occurrences of dissociations across "language organization" groups, the statistical analysis was completed on the absolute values of asymmetries within SENT\_CORE and SENT\_HUBS. We also examined in the ATYP and TYP\_MILD groups the effect of "dissociation" and its interactions with "task" on the strength of task-induced asymmetries. The TYP\_STRONG group was not considered in this analysis because there were only 2 DISSOCIATED individuals in this group.

In the same way, we examined the resting-state variables, i.e., the Rs\_DC asymmetries, Rs\_DC mean and Rs\_mIHHC. For Rs\_mIHHC, we performed the Fisher z-transformation to conduct the analysis.

Finally, using repeated measures MANOVA, we searched whether there was a difference in resting-state organization with the occurrence of "dissociations" depending on "language organization" (restricted to 2 factors ATYP and TYP, as the TYP\_STRONG and TYP\_MILD groups that were not different for Rs\_DC and Rs\_mIHHC were merged) by comparing their mean Rs\_DC values and asymmetries (including a main effect of "side" in the MANOVA), and SENT\_CORE Rs\_mIHHC.

All post hoc analyses were conducted using Tukey's HSD test for multiple comparisons.

### *Anatomical variables*

To investigate the brain structural differences in groups with different functional organization of language lateralization, we compared corpus callosum volume (CCvol) and asymmetries (left minus right) in gray matter (GMasym) and white matter (WMasym) hemispheric volumes. In this analysis, "CROSSED" or "CONGRUENT" was studied in interaction with the "language organization" main effect restricted to

2 factors ("TYP" and "ATYP").

First, to take into account variables that were found to covary with GMasym, WMasym and CCvol, we computed the residuals of MANCOVAs that included age, sex, total brain volume and handedness. These residuals of GMasym and WMasym were then entered in repeated measures ANOVA including a "language organization" main effect restricted to 2 factors ("TYP" and "ATYP") and dissociation ("CROSSED" or "CONGRUENT") and their interaction as fixed factors and their interaction with the anatomical compartment (gray matter or white matter).

The residuals of CCvol were entered in ANOVA searching for an effect of a "language organization" main effect restricted to 2 factors ("TYP" and "ATYP"), an effect of dissociation with two factors ("CROSSED" or "CONGRUENT") and their interaction.

### *Cognitive variables*

First, we performed a multiple linear regression analysis of the scores of the 11 tests of the cognitive battery, including sex, manual preference, age, education level and total intracranial volume as predictors since these variables have been shown to partly explain the variance in these scores (Mellet et al., 2013). Residuals of the 11 regression analyses were then entered into PCA with a promax rotation. We used the scree criterion to determine the number of components to be retained.

The "language organization" groups were compared with regard to their cognitive abilities through repeated measures MANCOVA including the 4 components of the PCA obtained from the residuals of the 11 scores. Finally, an impact of "dissociation" on cognitive abilities was also tested in the ATYP and TYP\_MILD groups (only 2 dissociations in TYP\_STRONG).

Post hoc analyses were conducted using uncorrected Student's t-tests.

### **Comparison of the different classifications for language lateralization**

We also compared the present classification based on a multitask and multimodal approach to two other classifications that were previously applied to the same group of individuals, namely, the GMM classification on the HFLI obtained with the  $PROD_{SENT\_WORD}$  contrast (Mazoyer et al., 2014) and an SVM approach applied at the voxel level, allowing us to classify the dominant and nondominant hemispheres of each participant according to their spatial pattern of activation during  $PROD_{SENT\_WORD}$  (Zago et al., 2017).

To compare these 3 different classifications obtained in the 287 subjects, we used the "ggalluvial" R library to make an alluvial plot (Brunson, 2019). The alluvial plot allowed us to visualize, for each subject, their classification as TYP\_STRONG, TYP\_MILD or ATYP issued from the present work, as typical (TYP),

ambilateral (AMB), or strong-atypical (SA) based on HFLI (Mazoyer et al., 2014), and the classification of each of the hemispheres as dominant or nondominant obtained with SVM (Zago et al., 2017). Two plots were made, which included one for right-handed people and another for left-handers.

## ACKNOWLEDGEMENTS

The authors thank their colleagues L. Zago and E. Mellet for their careful reading of the manuscript and V. Veraccia for expert technical assistance, supported by Ginesislab, a joint (University Bordeaux/CEA/CNRS and Fealinx) laboratory supported by the French government agency (ANR 16-LCV2-0006-01).

## COMPETING INTERESTS

The authors have no conflicts of interest to declare.

## REFERENCES

- Alexander, M. P., & Annett, M. (1996). Crossed aphasia and related anomalies of cerebral organization: Case reports and a genetic hypothesis. *Brain and Language*, 55(2), 213-239. doi: [10.1006/brln.1996.0102](https://doi.org/10.1006/brln.1996.0102).
- Auer, T., Pinter, S., Kovacs, N., Kalmar, Z., Nagy, F., Horvath, R. A., . . . Janszky, J. (2009). Does obstetric brachial plexus injury influence speech dominance? *Annals of Neurology*, 65(1), 57-66. doi: [10.1002/ana.21538](https://doi.org/10.1002/ana.21538).
- Baciu, M. V., Watson, J. M., Maccotta, L., McDermott, K. B., Buckner, R. L., Gilliam, F. G., & Ojemann, J. G. (2005). Evaluating functional MRI procedures for assessing hemispheric language dominance in neurosurgical patients. *Neuroradiology*, 47(11), 835-844. doi: [10.1007/s00234-005-1431-3](https://doi.org/10.1007/s00234-005-1431-3).
- Baciu, M. V., Watson, J. M., McDermott, K. B., Wetzel, R. D., Attarian, H., Moran, C. J., & Ojemann, J. G. (2003). Functional MRI reveals an interhemispheric dissociation of frontal and temporal language regions in a patient with focal epilepsy. *Epilepsy & Behavior*, 4(6), 776-780. doi: [10.1016/j.yebeh.2003.08.002](https://doi.org/10.1016/j.yebeh.2003.08.002).
- Bauer, P. R., Reitsma, J. B., Houweling, B. M., Ferrer, C. H., & Ramsey, N. F. (2013). Can fMRI safely replace the Wada test for preoperative assessment of language lateralisation? A meta-analysis and systematic review. *Journal of Neurology, Neurosurgery & Psychiatry*, 85(5), 581-588. doi: [10.1136/jnnp-2013-305659](https://doi.org/10.1136/jnnp-2013-305659).
- Binois, R., & Pichot, P. (1956). *Test de vocabulaire*. Paris, France: Éditions du Centre de psychologie.
- Bishop, D. V. M. (2013). Cerebral asymmetry and language development: Cause, correlate, or consequence? *Science (New York, NY)*, 340(6138), 1230531. doi: [10.1126/science.1230531](https://doi.org/10.1126/science.1230531).
- Brunson, J. C. (2020). ggalluvial: Alluvial Plots in 'ggplot2'. R package version 0.11.3. <https://CRAN.R-project.org/package=ggalluvial>
- Chang, E. F., Wang, D. D., Perry, D. W., Barbaro, N. M., & Berger, M. S. (2011). Homotopic organization of essential language sites in right and bilateral cerebral hemispheric dominance. *Journal of Neurosurgery*, 114(4), 893-902. doi: [10.3171/2010.11.jns10888](https://doi.org/10.3171/2010.11.jns10888).
- Charrad, M., Ghazzali, N., Boiteau, V., & Niknafs, A. (2014). NbClust: AnRPackage for determining the relevant number of clusters in a data set. *Journal of Statistical Software*, 61(6), 1-36. doi: [10.18637/jss.v061.i06](https://doi.org/10.18637/jss.v061.i06).
- Coppens, P., Hungerford, S., Yamaguchi, S., & Yamadori, A. (2002). Crossed aphasia: An analysis of the symptoms, their frequency, and a comparison with left-hemisphere aphasia symptomatology. *Brain and Language*, 83(3), 425-463. doi: [10.1016/s0093-934x\(02\)00510-2](https://doi.org/10.1016/s0093-934x(02)00510-2).
- Daneman, M., & Carpenter, P. A. (1980). Individual differences in working memory and reading. *Journal of Verbal Learning and Verbal Behavior*, 19(4), 450-466. doi: [10.1016/s0022-5371\(80\)90312-6](https://doi.org/10.1016/s0022-5371(80)90312-6).
- Dehaene-Lambertz, G. (2002). Functional Neuroimaging of Speech Perception in Infants. *Science*, 298(5600), 2013-2015.
- Della Sala, S., Gray, C., Baddeley, A., Allamano, N., & Wilson, L. (1999). Pattern span: a tool for unwelding visuo-spatial memory. *Neuropsychologia*, 37(10), 1189-1199. doi: [10.1016/s0028-3932\(98\)00159-6](https://doi.org/10.1016/s0028-3932(98)00159-6).
- Desmette, D., Hupet, M., Schelstraete, M.-A., & Van der Linden, M. (1995). Adaptation en langue française du "reading span test" de Daneman et Carpenter (1980). *L'année Psychologique*, 95(3), 459-482. doi: [10.3406/psy.1995.28842](https://doi.org/10.3406/psy.1995.28842).
- Dorion, A. A., Chantôme, M., Hasboun, D., Zouaoui, A., Marsault, C., Capron, C., & Duyme, M. (2000). Hemispheric asymmetry and corpus callosum morphometry: a magnetic resonance imaging study. *Neuroscience Research*, 36(1), 9-13. doi: [10.1016/s0168-0102\(99\)00102-9](https://doi.org/10.1016/s0168-0102(99)00102-9).
- Drane, D. L., Roraback-Carson, J., Hebb, A. O., Hersonskey, T., Lucas, T., Ojemann, G. A., . . . Ojemann, J. G. (2012). Cortical stimulation mapping and Wada results demonstrate a normal variant of right hemisphere language organization. *Epilepsia*, 53(10), 1790-1798.

doi: [10.1111/j.1528-1167.2012.03573.x](https://doi.org/10.1111/j.1528-1167.2012.03573.x).

- Dym, R. J., Burns, J., Freeman, K., & Lipton, M. L. (2011). Is Functional MR imaging assessment of hemispheric language dominance as good as the wada test?: A meta-analysis. *Radiology*, 261(2), 446-455. doi: [10.1148/radiol.11101344](https://doi.org/10.1148/radiol.11101344).
- Friederici, A. D., Brauer, J., & Lohmann, G. (2011). Maturation of the language network: From inter- to intrahemispheric connectivities. *PLoS one*, 6(6), e20726. doi: [10.1371/journal.pone.0020726](https://doi.org/10.1371/journal.pone.0020726).
- Fuster, J. M. (2009). Cortex and memory: Emergence of a new paradigm. *Journal of Cognitive Neuroscience*, 21(11), 2047-2072. doi: [10.1162/jocn.2009.21280](https://doi.org/10.1162/jocn.2009.21280).
- Habas, P. A., Scott, J. A., Roosta, A., Rajagopalan, V., Kim, K., Rousseau, F., . . . Studholme, C. (2012). Early folding patterns and asymmetries of the normal human brain detected from in utero MRI. *Cerebral Cortex (New York, NY : 1991)*, 22(1), 13-25. doi: [10.1093/cercor/bhr053](https://doi.org/10.1093/cercor/bhr053).
- Hécaen, H., De Agostini, M., & Monzon-Montes, A. (1981). Cerebral organization in left-handers. *Brain and Language*, 12(2), 261-284. doi: [10.1016/0093-934x\(81\)90018-3](https://doi.org/10.1016/0093-934x(81)90018-3).
- Hécaen, H., & Sauguet, J. (1971). Cerebral dominance in left-handed subjects. *Cortex*, 7(1), 19-48. doi: [10.1016/s0010-9452\(71\)80020-5](https://doi.org/10.1016/s0010-9452(71)80020-5).
- Hepper & Shahidullah (1994). Development of fetal hearing. *Archives of Disease in Childhood* 81-87.
- Hervé, P.-Y., Zago, L., Petit, L., Mazoyer, B., & Tzourio-Mazoyer, N. (2013). Revisiting human hemispheric specialization with neuroimaging. *Trends in Cognitive Sciences*, 17(2), 69-80. doi: [10.1016/j.tics.2012.12.004](https://doi.org/10.1016/j.tics.2012.12.004).
- Hill, J., Dierker, D., Neil, J., Inder, T., Knutsen, A., Harwell, J., . . . Van Essen, D. (2010). A surface-based analysis of hemispheric asymmetries and folding of cerebral cortex in term-born human infants. *The Journal of Neuroscience*, 30(6), 2268-2276. doi: [10.1523/JNEUROSCI.4682-09.2010](https://doi.org/10.1523/JNEUROSCI.4682-09.2010).
- Hindson, D. A. (1984). Persistent Broca's aphasia after right cerebral infarct ion in a right-hander. *Neurology*, 34(3), 387. doi: [10.1212/wnl.34.3.387](https://doi.org/10.1212/wnl.34.3.387).
- Hopkins, W. D., & Cantalupo, C. (2008). Theoretical speculations on the evolutionary origins of hemispheric specialization. *Current Directions in Psychological Science*, 17(3), 233-237. doi: [10.1111/j.1467-8721.2008.00581.x](https://doi.org/10.1111/j.1467-8721.2008.00581.x).
- Hund-Georgiadis, M., Lex, U., Friederici, A. D., & von Cramon, D. Y. (2002). Non-invasive regime for language lateralization in right and left-handers by means of functional MRI and dichotic listening. *Experimental Brain Research*, 145(2), 166-176. doi: [10.1007/s00221-002-1090-0](https://doi.org/10.1007/s00221-002-1090-0).
- Isaacs, K. L., Barr, W. B., Nelson, P. K., & Devinsky, O. (2006). Degree of handedness and cerebral dominance. *Neurology*, 66(12), 1855-1858. doi: [10.1212/01.wnl.0000219623.28769.74](https://doi.org/10.1212/01.wnl.0000219623.28769.74).
- Jansen, A., Deppe, M., Schwindt, W., Mohammadi, S., Sehlmeier, C., & Knecht, S. (2006). Interhemispheric dissociation of language regions in a healthy subject. *Archives of Neurology*, 63(9), 1344. doi: [10.1001/archneur.63.9.1344](https://doi.org/10.1001/archneur.63.9.1344).
- Joliot, M., Tzourio-Mazoyer, N., & Mazoyer, B. (2016). Intra-hemispheric intrinsic connectivity asymmetry and its relationships with handedness and language Lateralization. *Neuropsychologia*, 93, 437-447. doi: [10.1016/j.neuropsychologia.2016.03.013](https://doi.org/10.1016/j.neuropsychologia.2016.03.013).
- Josse, G., Kherif, F., Flandin, G., Seghier, M. L., & Price, C. J. (2009). Predicting language lateralization from gray matter. *The Journal of Neuroscience*, 29(43), 13516-13523. doi: [10.1523/JNEUROSCI.1680-09.2009](https://doi.org/10.1523/JNEUROSCI.1680-09.2009).
- Kassuba, T., Klinge, C., Hölig, C., Menz, M.M., Pfitz, M., Röder, B., and Siebner, H.R. (2011). The left fusiform gyrus hosts trisensory representations of manipulable objects. *Neuroimage* 56, 1566-1577.
- Króliczak, G., Piper, B. J., & Frey, S. H. (2016). Specialization of the left supramarginal gyrus for hand-independent praxis representation is not related to hand dominance. *Neuropsychologia*, 93(Pt B), 501-512. doi: [10.1016/j.neuropsychologia.2016.03.023](https://doi.org/10.1016/j.neuropsychologia.2016.03.023).
- Kurthen, M., Helmstaedter, C., Linke, D. B., Hufnagel, A., Elger, C. E., & Schramm, J. (1994). Quantitative and qualitative evaluation of patterns of cerebral language dominance. *Brain and Language*, 46(4), 536-564. doi: [10.1006/brln.1994.1030](https://doi.org/10.1006/brln.1994.1030).
- Kurthen, M., Helmstaedter, C., Linke, D. B., Solyosi, L., Elger, C. E., & Schramm, J. (1992). Interhemispheric dissociation of expressive and receptive language functions in patients with complex-partial seizures: An amobarbital study. *Brain and Language*, 43(4), 694-712. doi: [10.1016/0093-934x\(92\)90091-r](https://doi.org/10.1016/0093-934x(92)90091-r).
- Labache, L., Joliot, M., Saracco, J., Jobard, G., Hesling, I., Zago, L., . . . Tzourio-Mazoyer, N. (2019). A SENTence Supramodal Areas Atlas (SENSAAS) based on multiple task-induced activation mapping and graph analysis of intrinsic connectivity in 144 healthy right-handers. *Brain Structure & Function*, 224(2), 859-882. doi:

10.1007/s00429-018-1810-2.

- Lee, D., Swanson, S. J., Sabsevitz, D. S., Hammeke, T. A., Scott Winstanley, F., Possing, E. T., & Binder, J. R. (2008). Functional MRI and Wada studies in patients with interhemispheric dissociation of language functions. *Epilepsy & Behavior*, 13(2), 350-356. doi: [10.1016/j.yebeh.2008.04.010](https://doi.org/10.1016/j.yebeh.2008.04.010).
- Levy, J., & Reid, M. (1978). Variations in cerebral organization as a function of handedness, hand posture in writing, and sex. *Journal of Experimental Psychology: General*, 107(2), 119-144. doi: [10.1037/0096-3445.107.2.119](https://doi.org/10.1037/0096-3445.107.2.119).
- Li, G., Nie, J., Wang, L., Shi, F., Lyall, A. E., Lin, W., . . . Shen, D. (2014). Mapping longitudinal hemispheric structural asymmetries of the human cerebral cortex from birth to 2 years of age. *Cerebral Cortex (New York, NY : 1991)*, 24(5), 1289-1300. doi: [10.1093/cercor/bhs413](https://doi.org/10.1093/cercor/bhs413).
- Lieberman, P., Fecteau, S., Théoret, H., Garcia, R. R., Aboitiz, F., MacLarnon, A., . . . Lieberman, P. (2007). The evolution of human speech: Its anatomical and neural bases. *Current Anthropology*, 48(1), 39-66. doi: [10.1086/509092](https://doi.org/10.1086/509092).
- Lobier, M., Peyrin, C., Le Bas, J.-F., & Valdois, S. (2012). Pre-orthographic character string processing and parietal cortex: A role for visual attention in reading? *Neuropsychologia*, 50(9), 2195-2204. doi: [10.1016/j.neuropsychologia.2012.05.023](https://doi.org/10.1016/j.neuropsychologia.2012.05.023).
- Lopopolo, A., Frank, S. L., van den Bosch, A., & Willems, R. et al. (2019). Dependency parsing with your eyes: Dependency structure predicts eye regressions during reading.
- Mazoyer, B., Mellet, E., Perchey, G., Zago, L., Crivello, F., Jobard, G., . . . Tzourio-Mazoyer, N. (2016). BIL&GIN: A neuroimaging, cognitive, behavioral, and genetic database for the study of human brain lateralization. *NeuroImage*, 124(Pt B), 1225-1231. doi: [10.1016/j.neuroimage.2015.02.071](https://doi.org/10.1016/j.neuroimage.2015.02.071).
- Mazoyer, B., Zago, L., Jobard, G., Crivello, F., Joliot, M., Perchey, G., . . . Tzourio-Mazoyer, N. (2014). Gaussian mixture modeling of hemispheric lateralization for language in a large sample of healthy individuals balanced for handedness. *PLoS One*, 9(6), e101165. doi: [10.1371/journal.pone.0101165](https://doi.org/10.1371/journal.pone.0101165).
- McGlone, J., & Davidson, W. (1973). The relation between cerebral speech laterality and spatial ability with special reference to sex and hand preference. *Neuropsychologia*, 11(1), 105-113. doi: [10.1016/0028-3932\(73\)90070-5](https://doi.org/10.1016/0028-3932(73)90070-5).
- McMahon, E., Wintermark, P., and Lahav, A. (2012). Auditory brain development in premature infants: the importance of early experience. *Annals of the New York Academy of Sciences*, 1252, 17-24.
- McNorgan, C., Awati, N., Desroches, A. S., & Booth, J. R. et al. (2014). Multimodal Lexical Processing in Auditory Cortex Is Literacy Skill Dependent. *Cerebral Cortex*, 24(9), 2464-2475.
- Mellet, E., Jobard, G., Zago, L., Crivello, F., Petit, L., Joliot, M., . . . Tzourio-Mazoyer, N. (2013). Relationships between hand laterality and verbal and spatial skills in 436 healthy adults balanced for handedness. *Laterality: Asymmetries of Body, Brain and Cognition*, 19(4), 383-404. doi: [10.1080/1357650x.2013.796965](https://doi.org/10.1080/1357650x.2013.796965).
- Mellet, E., Zago, L., Jobard, G., Crivello, F., Petit, L., Joliot, M., . . . Tzourio-Mazoyer, N. (2014). Weak language lateralization affects both verbal and spatial skills: An fMRI study in 297 subjects. *Neuropsychologia*, 65, 56-62. doi: [10.1016/j.neuropsychologia.2014.10.010](https://doi.org/10.1016/j.neuropsychologia.2014.10.010).
- Mowrer, D.E. (1980). Phonological Development during the First Year of Life. In *Speech and Language*, N.J. Lass, ed. (Elsevier), pp. 99-142.
- Niskanen, E., Könönen, M., Villberg, V., Nissi, M., Ranta-Aho, P., Säisänen, L., . . . Vanninen, R. (2012). The effect of fMRI task combinations on determining the hemispheric dominance of language functions. *Neuroradiology*, 54(4), 393-405. doi: [10.1007/s00234-011-0959-7](https://doi.org/10.1007/s00234-011-0959-7).
- Oldfield, R. C. (1971). The assessment and analysis of handedness: The Edinburgh inventory. *Neuropsychologia*, 9(1), 97-113. doi: [10.1016/0028-3932\(71\)90067-4](https://doi.org/10.1016/0028-3932(71)90067-4).
- Oller (1980). The emergence of the sounds of speech in infancy. In *Child Phonology, Volume 1, Production*, (New York: Academic Press), pp. 93-112.
- Perani, D., Saccuman, M. C., Scifo, P., Anwander, A., Spada, D., Baldoli, C., . . . Friederici, A. D. (2011). Neural language networks at birth. *Proceedings of the National Academy of Sciences of the United States of America*, 108(38), 16056-16061. doi: [10.1073/pnas.1102991108](https://doi.org/10.1073/pnas.1102991108).
- Petit, L., Zago, L., Mellet, E., Jobard, G., Crivello, F., Joliot, M., . . . Tzourio-Mazoyer, N. (2014). Strong rightward lateralization of the dorsal attentional network in left-handers with right sighting-eye: An evolutionary advantage. *Human Brain Mapping*, 36(3), 1151-1164. doi: [10.1002/hbm.22693](https://doi.org/10.1002/hbm.22693).
- Petit, L., Zago, L., Vigneau, M., Andersson, F., Crivello, F., Mazoyer, B., . . . Tzourio-Mazoyer, N. (2009). Functional asymmetries revealed in visually guided saccades: An fMRI study. *Journal of Neurophysiology*, 102(5), 2994-3003. doi: [10.1152/jn.00280.2009](https://doi.org/10.1152/jn.00280.2009).



- Price, C. J. (2010). The anatomy of language: A review of 100 fMRI studies published in 2009. *Annals of the New York Academy of Sciences*, 1191(1), 62-88. doi: [10.1111/j.1749-6632.2010.05444.x](https://doi.org/10.1111/j.1749-6632.2010.05444.x).
- Price, C. J. (2012). A review and synthesis of the first 20 years of PET and fMRI studies of heard speech, spoken language and reading. *NeuroImage*, 62(2), 816-847. doi: [10.1016/j.neuroimage.2012.04.062](https://doi.org/10.1016/j.neuroimage.2012.04.062).
- Pujol, J., Deus, J., Losilla, J. M., & Capdevila, A. (1999). Cerebral lateralization of language in normal left-handed people studied by functional MRI. *Neurology*, 52(5), 1038-1038. doi: [10.1212/wnl.52.5.1038](https://doi.org/10.1212/wnl.52.5.1038).
- R Core Team (2013). R: A language and environment for statistical computing. Vienna, Austria: R Foundation for Statistical Computing.
- Raemaekers, M., Schellekens, W., Petridou, N., & Ramsey, N. F. (2018). Knowing left from right: Asymmetric functional connectivity during resting state. *Brain Structure & Function*, 223(4), 1909-1922. doi: [10.1007/s00429-017-1604-y](https://doi.org/10.1007/s00429-017-1604-y).
- Reynolds, J. E., Long, X., Grohs, M. N., Dewey, D., & Lebel, C. (2019). Structural and functional asymmetry of the language network emerge in early childhood. *Developmental Cognitive Neuroscience*, 39, 100682. doi: [10.1016/j.dcn.2019.100682](https://doi.org/10.1016/j.dcn.2019.100682).
- Rodgon, M., Monitz (1976). Single-word usage, cognitive development and the beginnings of combinatorial speech (Cambridge University Press)176 p.
- Sneath, P. H. A., & Sokal, R. R. (1973). Numerical taxonomy. San Francisco, CA: W H Freeman and Company.
- Somers, M., Aukes, M. F., Ophoff, R. A., Boks, M. P., Flier, W., de Visser, K. L., . . . Sommer, I. E. (2015). On the relationship between degree of hand-preference and degree of language lateralization. *Brain and Language*, 144, 10-15. doi: [10.1016/j.bandl.2015.03.006](https://doi.org/10.1016/j.bandl.2015.03.006).
- Somers, M., Shields, L. S., Boks, M. P., Kahn, R. S., & Sommer, I. E. (2015). Cognitive benefits of right-handedness: A meta-analysis. *Neuroscience & Biobehavioral Reviews*, 51, 48-63. doi: [10.1016/j.neubiorev.2015.01.003](https://doi.org/10.1016/j.neubiorev.2015.01.003).
- Sommer, I. E. C., Aleman, A., Bouma, A., & Kahn, R. S. (2004). Do women really have more bilateral language representation than men? A meta-analysis of functional imaging studies. *Brain*, 127(8), 1845-1852. doi: [10.1093/brain/awh207](https://doi.org/10.1093/brain/awh207).
- Szaflarski, J. P., Binder, J. R., Possing, E. T., McKiernan, K. A., Ward, B. D., & Hammeke, T. A. (2002). Language lateralization in left-handed and ambidextrous people. *Neurology*, 59(2), 238-244. doi: [10.1212/wnl.59.2.238](https://doi.org/10.1212/wnl.59.2.238).
- Szaflarski, J. P., Rajagopal, A., Altaye, M., Byars, A. W., Jacola, L., Schmithorst, V. J., . . . Holland, S. K. (2011). Left-handedness and language lateralization in children. *Brain Research*, 1433, 85-97. doi: [10.1016/j.brainres.2011.11.026](https://doi.org/10.1016/j.brainres.2011.11.026).
- Tallal, P. (1981). Language disabilities in children: Perceptual correlates. *International Journal of Pediatric Otorhinolaryngology*, 3(1), 1-13. doi: [10.1016/0165-5876\(81\)90014-8](https://doi.org/10.1016/0165-5876(81)90014-8).
- Tallal, P., & Schwartz, J. (1981). Hemispheric specialization for language processes. *Science*, 211(4485), 961. doi: [10.1126/science.211.4485.961](https://doi.org/10.1126/science.211.4485.961).
- Toga, A. W., & Thompson, P. M. (2003). Mapping brain asymmetry. *Nature Reviews Neuroscience*, 4(1), 37-48. doi: [10.1038/nrn1009](https://doi.org/10.1038/nrn1009).
- Tzourio-Mazoyer, N., Crivello, F., & Mazoyer, B. (2018). Is the planum temporale surface area a marker of hemispheric or regional language lateralization? *Brain Structure & Function*, 223(3), 1217-1228. doi: [10.1007/s00429-017-1551-7](https://doi.org/10.1007/s00429-017-1551-7).
- Tzourio-Mazoyer, N., Joliot, M., Marie, D., & Mazoyer, B. (2016). Variation in homotopic areas' activity and inter-hemispheric intrinsic connectivity with type of language lateralization: An fMRI study of covert sentence generation in 297 healthy volunteers. *Brain Structure & Function*, 221(5), 2735-2753. doi: [10.1007/s00429-015-1068-x](https://doi.org/10.1007/s00429-015-1068-x).
- Tzourio-Mazoyer, N., Josse, G., Crivello, F., & Mazoyer, B. (2004). Interindividual variability in the hemispheric organization for speech. *NeuroImage*, 21(1), 422-435. doi: [10.1016/j.neuroimage.2003.08.032](https://doi.org/10.1016/j.neuroimage.2003.08.032).
- Van Der Elst, W. I. M., Van Boxtel, M. P. J., Van Breukelen, G. J. P., & Jolles, J. (2005). Rey's verbal learning test: Normative data for 1855 healthy participants aged 24-81 years and the influence of age, sex, education, and mode of presentation. *Journal of the International Neuropsychological Society*, 11(3), 290-302. doi: [10.1017/s1355617705050344](https://doi.org/10.1017/s1355617705050344).
- Vandenberg, S. G., & Kuse, A. R. (1978). Mental rotations, a group test of three-dimensional spatial visualization. *Perceptual and Motor Skills*, 47(2), 599-604. doi: [10.2466/pms.1978.47.2.599](https://doi.org/10.2466/pms.1978.47.2.599).
- Vigneau, M., Beaucois, V., Hervé, P. Y., Duffau, H., Crivello, F., Houdé, O., . . . Tzourio-Mazoyer, N. (2006). Meta-analyzing left hemisphere language areas: Phonology, semantics, and sentence processing. *NeuroImage*, 30(4), 1414-1432. doi: [10.1016/j.neuroimage.2005.11.002](https://doi.org/10.1016/j.neuroimage.2005.11.002).
- Vingerhoets, G. (2019). Phenotypes in hemispheric

- functional segregation? Perspectives and challenges. *Physics of Life Reviews*, 30, 1-18. doi: [10.1016/j.plrev.2019.06.002](https://doi.org/10.1016/j.plrev.2019.06.002).
- Ward Jr, J. H. (1963). Hierarchical grouping to optimize an objective function. *Journal of the American Statistical Association*, 58(301), 236-244. doi: [10.1080/01621459.1963.10500845](https://doi.org/10.1080/01621459.1963.10500845).
- Wilke, M., & Schmithorst, V. J. (2006). A combined bootstrap/histogram analysis approach for computing a lateralization index from neuroimaging data. *NeuroImage*, 33(2), 522-530. doi: [10.1016/j.neuroimage.2006.07.010](https://doi.org/10.1016/j.neuroimage.2006.07.010).
- Wilson, A. C., & Bishop, D. V. M. (2018). Resounding failure to replicate links between developmental language disorder and cerebral lateralisation. *PeerJ*, 6, e4217. doi: [10.7717/peerj.4217](https://doi.org/10.7717/peerj.4217).
- Yagle, K., Richards, T., Askren, K., Mestre, Z., Beers, S., Abbott, R. et al. (2017). Relationships between eye movements during sentence reading comprehension, word spelling and reading, and DTI and fMRI connectivity in students with and without dysgraphia or dyslexia. *Journal of systems and integrative neuroscience*, 3(1).
- Zago, L., Hervé, P.-Y., Genuer, R., Laurent, A., Mazoyer, B., Tzourio-Mazoyer, N., & Joliot, M. (2017). Predicting hemispheric dominance for language production in healthy individuals using support vector machine. *Human Brain Mapping*, 38(12), 5871-5889. doi: [10.1002/hbm.23770](https://doi.org/10.1002/hbm.23770).
- Zatorre, R. J., Belin, P., & Penhune, V. B. (2002). Structure and function of auditory cortex: Music and speech. *Trends in Cognitive Sciences*, 6(1), 37-46. doi: [10.1016/s1364-6613\(00\)01816-7](https://doi.org/10.1016/s1364-6613(00)01816-7).
